# Supplementary material
Source: PubMed Central journal article supplement (PMC5698650)
Supplement: rspb20171800supp4.pdf [file rspb20171800supp4.pdf]

**Piñeiro et al. Population fragmentation of two African trees during the Ice Ages**

Table S1. Collection information of 732 individuals of *Greenwayodendron suaveolens* and *Scorodophloeus zenkeri*, including nSSR Bayesian clustering assignments and cpDNA haplotype for each individual.

| Voucher                                                            | Elevation | Latitude | Longitude | nSSR | cpDNA | Country  |
|--------------------------------------------------------------------|-----------|----------|-----------|------|-------|----------|
| <i>G. suaveolens</i> ssp. <i>suaveolens</i> var. <i>suaveolens</i> |           |          |           |      |       |          |
| GiD0201                                                            | 940       | 11.23    | 0.40      | NW   | 1     | Gabon    |
| MH1487                                                             | 618       | 11.13    | 2.84      | NW   | 1     | Cameroon |
| MH1502                                                             | 586       | 11.13    | 2.83      | NW   | 1     | Cameroon |
| MH1870                                                             |           | 11.38    | 3.92      | NW   | 1     | Cameroon |
| MH2095                                                             | 456       | 10.54    | 2.79      | NW   | 1     | Cameroon |
| OL0673                                                             | 510       | 10.54    | 2.76      | NW   | 1     | Cameroon |
| TOD0597                                                            |           | 10.66    | 3.46      | NW   | 1     | Cameroon |
| TOD0736                                                            |           | 10.43    | 3.12      | NW   | 1     | Cameroon |
| TOD0836                                                            |           | 11.57    | 5.51      | NW   | 1     | Cameroon |
| GiD0170                                                            | 400       | 11.23    | 0.40      | NW   | 1     | Gabon    |
| OH2964                                                             | 509       | 11.11    | 0.57      | NW   | 1     | Gabon    |
| GiD1667                                                            | 319       | 11.42    | -3.41     | NW   | 2     | Gabon    |
| BS0133                                                             | 713       | 9.26     | 4.82      | NW   | 3     | Cameroon |
| BS0130                                                             | 966       | 9.26     | 4.81      | NW   | 4     | Cameroon |
| BS0131                                                             | 929       | 9.26     | 4.81      | NW   | 4     | Cameroon |
| BS0132                                                             | 877       | 9.26     | 4.81      | NW   | 4     | Cameroon |
| BS0081                                                             | 492       | 11.35    | 4.97      | NW   | 1a    | Cameroon |
| BS0083                                                             | 486       | 11.38    | 4.98      | NW   | 1a    | Cameroon |
| TOD0814                                                            |           | 11.25    | 5.58      | NW   | 1a    | Cameroon |
| TOD0900                                                            |           | 11.66    | 5.38      | NW   | 1a    | Cameroon |
| TOD0906                                                            |           | 11.66    | 5.38      | NW   | 1a    | Cameroon |
| MH1629                                                             | 478       | 10.54    | 2.79      | NW   | 1c    | Cameroon |
| MH1528                                                             | 549       | 10.79    | 2.52      | NW   | 1d    | Cameroon |
| MH1532                                                             | 580       | 10.79    | 2.52      | NW   | 1d    | Cameroon |
| MH1534                                                             | 571       | 10.79    | 2.52      | NW   | 1d    | Cameroon |
| MH1551                                                             | 543       | 10.62    | 2.38      | NW   | 1d    | Cameroon |
| MH1557                                                             | 499       | 10.62    | 2.39      | NW   | 1d    | Cameroon |
| MH2093                                                             |           | 10.62    | 2.39      | NW   | 1d    | Cameroon |
| MH2094                                                             | 438       | 10.53    | 2.79      | NW   | 1d    | Cameroon |
| OL0746D                                                            | 34        | 9.96     | 2.37      | NW   | 1d    | Cameroon |
| OL0793                                                             | 5         | 9.95     | 2.34      | NW   | 1d    | Cameroon |
| OL0793B                                                            | 5         | 9.95     | 2.34      | NW   | 1d    | Cameroon |
| OL0793D                                                            | 5         | 9.95     | 2.34      | NW   | 1d    | Cameroon |
| TOD0690                                                            |           | 10.58    | 3.23      | NW   | 1d    | Cameroon |
| MH1554                                                             | 530       | 10.62    | 2.39      | NW   | 1d    | Cameroon |
| BS0072                                                             | 548       | 10.79    | 2.69      | NW   |       | Cameroon |
| BS0073                                                             | 552       | 10.79    | 2.68      | NW   |       | Cameroon |
| BS0074                                                             | 579       | 10.78    | 2.70      | NW   |       | Cameroon |
| BS0075                                                             | 558       | 10.78    | 2.69      | NW   |       | Cameroon |
| BS0080                                                             | 491       | 11.35    | 4.97      | NW   |       | Cameroon |

## Piñeiro et al. Population fragmentation of two African trees during the Ice Ages

|         |     |       |       |    |   |          |
|---------|-----|-------|-------|----|---|----------|
| MH1513  | 578 | 11.08 | 2.75  | NW |   | Cameroon |
| MH1866  | 751 | 10.91 | 3.26  | NW |   | Cameroon |
| MH1867  | 588 | 11.30 | 3.17  | NW |   | Cameroon |
| MH1868  | 98  | 10.43 | 3.18  | NW |   | Cameroon |
| MH2098  | 68  | 9.95  | 2.28  | NW |   | Cameroon |
| MH2601  | 526 | 10.53 | 3.18  | NW |   | Cameroon |
| MH2606  | 531 | 10.54 | 3.18  | NW |   | Cameroon |
| MH2676  | 493 | 10.74 | 3.35  | NW |   | Cameroon |
| MH2705  | 520 | 10.73 | 3.34  | NW |   | Cameroon |
| TOD0410 |     | 10.49 | 4.60  | NW |   | Cameroon |
| TOD0746 |     | 10.43 | 3.11  | NW |   | Cameroon |
| TOD0830 |     | 11.49 | 5.66  | NW |   | Cameroon |
| TOD0855 |     | 11.55 | 5.53  | NW |   | Cameroon |
| TS0104  | 723 | 10.50 | 0.48  | NW |   | Gabon    |
| SD2277  | 606 | 12.83 | -1.00 | NW | 1 | Gabon    |
| GiD0345 | 30  | 10.17 | -1.80 | NW | 2 | Gabon    |
| TS0088  | 550 | 10.50 | 0.47  | NW |   | Gabon    |
| GiD0859 | 80  | 10.19 | 0.46  |    | 1 | Gabon    |
| GiD0865 | 519 | 12.81 | 1.50  |    | 1 | Gabon    |
| GiD1208 | 562 | 12.71 | -1.34 |    | 1 | Gabon    |
| GiD1209 | 562 | 12.71 | -1.34 |    | 1 | Gabon    |
| RM0020  |     | 12.07 | 0.58  |    | 1 | Gabon    |
| CD0207  |     | 9.76  | -0.94 |    | 2 | Gabon    |
| OH2614  | 569 | 10.35 | 0.70  | SW | 1 | Gabon    |
| OH1584  | 41  | 10.16 | -2.76 | SW | 1 | Gabon    |
| CD0376  |     | 9.57  | 0.93  | SW | 1 | Gabon    |
| GiD0166 | 400 | 11.21 | 0.40  | SW | 1 | Gabon    |
| GiD0852 | 155 | 10.19 | 0.46  | SW | 1 | Gabon    |
| GiD0853 | 149 | 10.19 | 0.46  | SW | 1 | Gabon    |
| GiD0854 | 218 | 10.19 | 0.44  | SW | 1 | Gabon    |
| GiD0855 | 216 | 10.19 | 0.44  | SW | 1 | Gabon    |
| GiD0858 | 514 | 12.81 | 1.49  | SW | 1 | Gabon    |
| GK0035A | 131 | 10.27 | 0.48  | SW | 1 | Gabon    |
| GK0035B | 149 | 10.27 | 0.48  | SW | 1 | Gabon    |
| OH2607  | 122 | 10.21 | 0.52  | SW | 1 | Gabon    |
| GiD0869 | 429 | 10.20 | 0.45  | SW | 1 | Gabon    |
| GiD0870 | 383 | 10.20 | 0.45  | SW | 1 | Gabon    |
| GiD1124 | 164 | 10.88 | -1.37 | SW | 2 | Gabon    |
| CD0154  |     | 10.16 | -0.90 | SW | 2 | Gabon    |
| GiD0008 | 650 | 11.36 | -1.61 | SW | 2 | Gabon    |
| GiD0016 | 650 | 11.36 | -1.61 | SW | 2 | Gabon    |
| GiD0024 | 700 | 11.36 | -1.61 | SW | 2 | Gabon    |
| GiD0672 | 581 | 11.23 | -0.68 | SW | 2 | Gabon    |
| GiD0674 | 584 | 11.22 | -0.68 | SW | 2 | Gabon    |
| GiD0683 | 584 | 11.22 | -0.68 | SW | 2 | Gabon    |
| GiD0831 |     | 9.33  | 0.58  | SW | 2 | Gabon    |

## Piñero et al. Population fragmentation of two African trees during the Ice Ages

|         |     |       |       |    |    |                                 |
|---------|-----|-------|-------|----|----|---------------------------------|
| GiD0868 | 260 | 10.20 | 0.45  | SW | 2  | Gabon                           |
| GiD0871 | 286 | 10.20 | 0.45  | SW | 2  | Gabon                           |
| GiD1121 | 164 | 10.88 | -1.38 | SW | 2  | Gabon                           |
| GiD1196 | 52  | 9.87  | -1.84 | SW | 2  | Gabon                           |
| GiD1197 | 46  | 9.87  | -1.84 | SW | 2  | Gabon                           |
| OH2544  | 75  | 9.98  | 0.43  | SW | 2  | Gabon                           |
| OH2569  | 99  | 10.18 | 0.49  | SW | 2  | Gabon                           |
| TS0042  |     | 11.11 | -0.59 | SW | 2  | Gabon                           |
| CD0433  |     | 9.59  | -0.13 | SW | 2  | Gabon                           |
| OH3119  | 33  | 10.56 | -0.21 | SW | 2  | Gabon                           |
| MH0706  |     | 9.33  | 0.54  | SW | 1e | Gabon                           |
| OH0105  | 48  | 9.33  | 0.57  | SW | 1e | Gabon                           |
| GiD1643 | 51  | 11.16 | -3.65 | SW | 2a | Gabon                           |
| GiD0675 | 582 | 11.22 | -0.69 | SW | 2b | Gabon                           |
| CD0266  |     | 9.94  | -1.72 | SW |    | Gabon                           |
| GK0033  | 323 | 10.27 | 0.47  | SW |    | Gabon                           |
| NB0078  | 455 | 25.29 | 0.29  | SW |    | Democratic Republic of<br>Congo |
| NB0159  | 470 | 24.49 | 0.81  | SW |    | Democratic Republic of<br>Congo |
| GiD0424 | 100 | 10.17 | -1.79 | SW |    | Gabon                           |
| GiD1130 |     | 9.88  | -1.83 | SW |    | Gabon                           |
| MH0707  |     | 9.33  | 0.54  | SW |    | Gabon                           |
| TS0060  | 785 | 11.76 | -0.62 | SW |    | Gabon                           |
| OH1593  | 17  | 10.26 | -2.93 | SW |    | Gabon                           |
| CD0158  |     | 9.96  | -1.15 | SW |    | Gabon                           |
| CD0174  |     | 9.76  | -0.64 | SW |    | Gabon                           |
| CD0274  |     | 9.96  | -1.90 | SW |    | Gabon                           |
| CD0400  |     | 9.88  | -0.39 | SW |    | Gabon                           |
| GiD0029 | 700 | 11.37 | -1.61 | SW |    | Gabon                           |
| GiD0050 | 738 | 11.36 | -1.61 | SW |    | Gabon                           |
| GiD0139 | 573 | 11.29 | -1.23 | SW |    | Gabon                           |
| GiD0838 |     | 11.24 | -1.11 | SW |    | Gabon                           |
| GiD1126 |     | 9.88  | -1.91 | SW |    | Gabon                           |
| GiD1132 |     | 9.84  | -1.88 | SW |    | Gabon                           |
| MH1028  | 585 | 10.37 | 0.63  | SW |    | Gabon                           |
| MH1037  | 556 | 10.38 | 0.63  | SW |    | Gabon                           |
| SD2507  | 26  | 9.34  | 0.59  | SW |    | Gabon                           |
| TS0110  | 550 | 10.51 | 0.46  | SW |    | Gabon                           |
| MH0166  |     | 25.80 | 4.38  | SW |    | Democratic Republic of<br>Congo |
| GiD0856 | 528 | 12.81 | 1.49  | SW | 1  | Gabon                           |
| GiD0669 | 427 | 11.26 | -0.85 | NE | 1  | Gabon                           |
| GiD0295 | 150 | 10.18 | -1.82 | NE | 2  | Gabon                           |
| OH2941  | 350 | 11.19 | 0.39  | NE | 2  | Gabon                           |
| GiD0017 | 768 | 11.37 | -1.60 | NE | 2  | Gabon                           |
| TOD1740 | 310 | 9.26  | 5.48  | NE |    | Cameroon                        |
| GiD0054 |     | 11.36 | -1.61 | NE |    | Gabon                           |
| TOD1728 | 299 | 9.39  | 5.91  | NE |    | Cameroon                        |

## Piñeiro et al. Population fragmentation of two African trees during the Ice Ages

|         |     |       |       |    |   |                                 |
|---------|-----|-------|-------|----|---|---------------------------------|
| TOD1648 | 247 | 9.35  | 5.87  | NE |   | Cameroon                        |
| GiD0670 | 367 | 11.26 | -0.86 | NE | 1 | Gabon                           |
| GiD0862 | 132 | 10.19 | 0.45  | NE | 1 | Gabon                           |
| GiD0863 | 481 | 12.80 | 1.49  | NE | 1 | Gabon                           |
| GiD0867 | 700 | 11.12 | -3.28 | NE | 1 | Gabon                           |
| GiD1210 | 562 | 12.71 | -1.34 | NE | 1 | Gabon                           |
| GiD1212 | 607 | 12.72 | -1.34 | NE | 1 | Gabon                           |
| GiD1695 | 40  | 11.16 | -3.66 | NE | 1 | Gabon                           |
| JFG0032 | 378 | 16.29 | 2.10  | NE | 1 | Congo                           |
| KD0007  | 556 | 17.91 | 3.88  | NE | 1 | Central African Republic        |
| KD0010  | 557 | 17.91 | 3.88  | NE | 1 | Central African Republic        |
| KD0014  | 562 | 17.91 | 3.88  | NE | 1 | Central African Republic        |
| KD0035  | 561 | 17.90 | 3.88  | NE | 1 | Central African Republic        |
| KD0057  | 560 | 17.90 | 3.88  | NE | 1 | Central African Republic        |
| KD0105  | 565 | 17.91 | 3.88  | NE | 1 | Central African Republic        |
| KD0157  | 572 | 17.89 | 3.87  | NE | 1 | Central African Republic        |
| KD0198  | 527 | 17.87 | 3.82  | NE | 1 | Central African Republic        |
| MH0848  | 311 | 12.31 | -1.09 | NE | 1 | Gabon                           |
| MH0891  | 309 | 12.30 | -1.06 | NE | 1 | Gabon                           |
| MH0893  | 309 | 12.30 | -1.06 | NE | 1 | Gabon                           |
| OL0621  | 444 | 11.28 | 2.72  | NE | 1 | Cameroon                        |
| SD2228  | 389 | 13.87 | -1.86 | NE | 1 | Gabon                           |
| GK0080  | 516 | 12.80 | 0.51  | NE | 1 | Gabon                           |
| GK0083  | 518 | 12.80 | 0.51  | NE | 1 | Gabon                           |
| GK0206  | 862 | 13.22 | 1.12  | NE | 1 | Gabon                           |
| JD0257  |     | 15.23 | 2.98  | NE | 1 | Cameroon                        |
| KD0074  | 574 | 17.91 | 3.88  | NE | 1 | Central African Republic        |
| LD0015  |     | 12.72 | 3.33  | NE | 1 | Cameroon                        |
| OH1372  | 402 | 16.61 | -2.42 | NE | 1 | Gabon                           |
| OH2972  | 452 | 11.11 | 0.56  | NE | 1 | Gabon                           |
| GiD0235 | 133 | 10.17 | -1.80 | NE | 2 | Gabon                           |
| GiD0678 | 352 | 11.27 | -0.85 | NE | 2 | Gabon                           |
| GiD0680 | 308 | 12.36 | -0.08 | NE | 2 | Gabon                           |
| GiD0015 | 650 | 11.36 | -1.61 | NE | 2 | Gabon                           |
| CD0460  |     | 11.09 | -2.81 | NE | 2 | Gabon                           |
| CD0486  |     | 11.15 | -3.28 | NE | 2 | Gabon                           |
| CD0614  |     | 11.40 | -3.04 | NE | 2 | Gabon                           |
| CD0631  |     | 11.28 | -3.12 | NE | 2 | Gabon                           |
| CD0687  |     | 10.55 | -2.42 | NE | 2 | Gabon                           |
| CD0733  |     | 10.74 | -3.09 | NE | 2 | Gabon                           |
| GiD0100 | 620 | 11.30 | -1.22 | NE | 2 | Gabon                           |
| GiD0182 | 480 | 11.23 | 0.40  | NE | 2 | Gabon                           |
| GiD0485 |     | 25.31 | 0.29  | NE | 2 | Democratic Republic of<br>Congo |
| GiD0676 | 311 | 12.37 | -0.08 | NE | 2 | Gabon                           |
| GiD0874 | 531 | 11.12 | -3.28 | NE | 2 | Gabon                           |
| GiD1193 |     | 9.27  | -0.45 | NE | 2 | Gabon                           |

## Piñeiro et al. Population fragmentation of two African trees during the Ice Ages

|          |     |       |       |    |    |                              |
|----------|-----|-------|-------|----|----|------------------------------|
| GiD1664  | 772 | 11.42 | -3.43 | NE | 2  | Gabon                        |
| GiD1666  | 366 | 11.42 | -3.41 | NE | 2  | Gabon                        |
| GiD1668  | 548 | 11.42 | -3.42 | NE | 2  | Gabon                        |
| GiD1697  | 368 | 11.41 | -3.42 | NE | 2  | Gabon                        |
| MH0961   | 460 | 11.25 | -2.67 | NE | 2  | Gabon                        |
| MH0969   | 374 | 11.25 | -2.68 | NE | 2  | Gabon                        |
| MH0989   | 411 | 11.25 | -2.67 | NE | 2  | Gabon                        |
| MH1021   | 377 | 11.25 | -2.65 | NE | 2  | Gabon                        |
| OH1582   | 43  | 10.22 | -2.77 | NE | 2  | Gabon                        |
| OH1587   | 48  | 10.16 | -2.79 | NE | 2  | Gabon                        |
| OH1594   | 133 | 10.18 | -2.39 | NE | 2  | Gabon                        |
| OH1675   | 15  | 10.14 | -2.39 | NE | 2  | Gabon                        |
| SD1948   | 512 | 10.40 | -1.88 | NE | 2  | Gabon                        |
| SD2309   | 624 | 11.80 | -1.15 | NE | 2  | Gabon                        |
| CD0472   |     | 11.12 | -2.69 | NE | 2  | Gabon                        |
| GiD0066  | 561 | 11.28 | -1.23 | NE | 2  | Gabon                        |
| GiD0671  | 370 | 11.27 | -0.85 | NE | 2  | Gabon                        |
| GiD0866  |     | 11.12 | -3.28 | NE | 2  | Gabon                        |
| GiD0677  | 309 | 12.35 | -0.08 | NE | 2  | Gabon                        |
| NB0084   | 470 | 24.48 | 0.81  | NE | 1f | Democratic Republic of Congo |
| NB0095   | 450 | 24.49 | 0.80  | NE | 1f | Democratic Republic of Congo |
| NB0269   | 455 | 25.32 | 0.29  | NE | 1f | Democratic Republic of Congo |
| NB0278   | 445 | 24.48 | 0.80  | NE | 1f | Democratic Republic of Congo |
| NB0284   | 440 | 25.30 | 0.29  | NE | 1f | Democratic Republic of Congo |
| NB0285   | 440 | 25.31 | 0.29  | NE | 1f | Democratic Republic of Congo |
| NB0286   | 450 | 25.31 | 0.29  | NE | 1f | Democratic Republic of Congo |
| NB0150   | 450 | 25.30 | 0.29  | NE | 1f | Democratic Republic of Congo |
| GiD1663  | 97  | 11.16 | -3.65 | NE | 2a | Gabon                        |
| GiD1669  | 55  | 11.16 | -3.66 | NE | 2a | Gabon                        |
| GiD1670  | 49  | 11.17 | -3.65 | NE | 2a | Gabon                        |
| GiD1694  | 43  | 11.16 | -3.66 | NE | 2a | Gabon                        |
| CD0655   |     | 10.54 | -2.42 | NE | 2d | Gabon                        |
| CD0671   |     | 10.53 | -2.43 | NE | 2d | Gabon                        |
| OH1590   | 80  | 10.15 | -2.77 | NE | 2d | Gabon                        |
| OH1596   | 166 | 10.19 | -2.39 | NE | 2d | Gabon                        |
| MH0772   | 722 | 12.29 | -1.65 | NE |    | Gabon                        |
| NB0144   | 445 | 25.30 | 0.29  | NE |    | Democratic Republic of Congo |
| OH1585   | 93  | 10.17 | -2.79 | NE |    | Gabon                        |
| OH2937   | 243 | 11.20 | 0.31  | NE |    | Gabon                        |
| KD0250   | 520 | 17.86 | 3.83  | NE |    | Central African Republic     |
| TS0006   | 595 | 10.38 | 0.62  | NE |    | Gabon                        |
| TS0041   |     | 11.11 | -0.58 | NE |    | Gabon                        |
| TOD1754  | 318 | 9.22  | 5.46  | NE |    | Cameroon                     |
| ACL12066 | 332 | 13.20 | -5.59 | NE |    | Democratic Republic of Congo |

## Piñeiro et al. Population fragmentation of two African trees during the Ice Ages

|          |     |       |       |    |                              |
|----------|-----|-------|-------|----|------------------------------|
| ACL12067 | 320 | 13.20 | -5.57 | NE | Democratic Republic of Congo |
| ACL12069 | 212 | 13.13 | -5.59 | NE | Democratic Republic of Congo |
| ACL12070 | 269 | 13.10 | -5.61 | NE | Democratic Republic of Congo |
| CD0438   |     | 9.52  | -0.13 | NE | Gabon                        |
| CD0505   |     | 11.14 | -3.28 | NE | Gabon                        |
| CD0543   |     | 11.13 | -3.29 | NE | Gabon                        |
| CD0573   |     | 11.09 | -2.99 | NE | Gabon                        |
| CD0642   |     | 10.59 | -2.32 | NE | Gabon                        |
| GiD0010  | 650 | 11.37 | -1.61 | NE | Gabon                        |
| GiD0147  | 650 | 11.23 | 0.42  | NE | Gabon                        |
| GiD0681  | 331 | 12.36 | -0.07 | NE | Gabon                        |
| GiD0839  |     | 11.23 | -1.11 | NE | Gabon                        |
| GiD1200  | 381 | 12.73 | -0.24 | NE | Gabon                        |
| GiD1203  | 279 | 12.60 | -0.84 | NE | Gabon                        |
| GiD1204  | 392 | 12.55 | -0.70 | NE | Gabon                        |
| GiD1206  | 513 | 12.72 | -1.35 | NE | Gabon                        |
| GiD1213  | 523 | 12.72 | -1.35 | NE | Gabon                        |
| GK0228   | 869 | 13.21 | 1.11  | NE | Gabon                        |
| JD0262   |     | 15.22 | 2.99  | NE | Cameroon                     |
| JFG0027  | 409 | 16.18 | 2.15  | NE | Congo                        |
| JFG0029  | 390 | 16.38 | 2.05  | NE | Congo                        |
| JFG0033  | 377 | 16.84 | 1.22  | NE | Congo                        |
| KD0067   | 568 | 17.91 | 3.88  | NE | Central African Republic     |
| KD0125   | 572 | 17.90 | 3.88  | NE | Central African Republic     |
| KD0205   | 528 | 17.87 | 3.82  | NE | Central African Republic     |
| KD0254   | 522 | 17.86 | 3.83  | NE | Central African Republic     |
| MH0158   |     | 16.17 | 2.37  | NE | Central African Republic     |
| MH0160   |     | 12.23 | 4.72  | NE | Congo                        |
| MH0161   |     | 13.09 | -5.61 | NE | Democratic Republic of Congo |
| MH0164   |     | 24.44 | 0.77  | NE | Democratic Republic of Congo |
| MH0800   | 480 | 13.88 | -1.87 | NE | Gabon                        |
| OH1586   | 85  | 10.17 | -2.79 | NE | Gabon                        |
| OH1588   | 106 | 10.14 | -2.77 | NE | Gabon                        |
| OH1592   | 86  | 10.12 | -2.74 | NE | Gabon                        |
| OH3051   | 295 | 11.20 | 0.30  | NE | Gabon                        |
| OH3070   | 259 | 11.14 | 0.17  | NE | Gabon                        |
| OH3089   | 122 | 10.98 | -0.06 | NE | Gabon                        |
| TOD1794  | 342 | 9.24  | 5.49  | NE | Cameroon                     |
| TS0098   | 735 | 10.50 | 0.48  | NE | Gabon                        |
| TS0129   | 764 | 12.23 | -2.04 | NE | Gabon                        |
| TS0135   | 725 | 12.24 | -2.04 | NE | Gabon                        |
| GK0317   | 476 | 12.57 | 0.29  | NE | Gabon                        |
| TS0127   | 770 | 12.22 | -2.04 | NE | Gabon                        |
| TS0128   | 770 | 12.22 | -2.04 | NE | Gabon                        |
| TS0131   | 740 | 12.24 | -2.04 | NE | Gabon                        |

## Piñeiro et al. Population fragmentation of two African trees during the Ice Ages

|         |      |       |       |    |   |          |
|---------|------|-------|-------|----|---|----------|
| GiD0002 | 600  | 11.37 | -1.61 | SE |   | Gabon    |
| GiD0109 | 640  | 11.28 | -1.23 | SE |   | Gabon    |
| RM0028  |      | 12.87 | -0.41 | SE | 1 | Gabon    |
| JD0438  |      | 14.82 | 3.96  | SE | 1 | Cameroon |
| OH1371  | 402  | 16.61 | -2.42 | SE | 1 | Gabon    |
| RM0024  |      | 12.06 | 0.57  | SE | 1 | Gabon    |
| RM0001  |      | 12.87 | -0.42 | SE | 1 | Gabon    |
| GiD0876 | 514  | 12.81 | 1.50  | SE | 1 | Gabon    |
| GiD0878 | 493  | 12.81 | 1.49  | SE | 1 | Gabon    |
| GiD1198 | 390  | 12.74 | -0.24 | SE | 1 | Gabon    |
| GiD1211 | 596  | 12.72 | -1.34 | SE | 1 | Gabon    |
| GK0111  | 467  | 12.79 | 0.52  | SE | 1 | Gabon    |
| GK0195  | 649  | 13.22 | 1.12  | SE | 1 | Gabon    |
| GK0210  | 921  | 13.22 | 1.12  | SE | 1 | Gabon    |
| GK0218  | 893  | 13.21 | 1.11  | SE | 1 | Gabon    |
| GK0255  | 767  | 13.22 | 1.11  | SE | 1 | Gabon    |
| JD0251  |      | 15.23 | 2.96  | SE | 1 | Cameroon |
| JD0278  |      | 15.22 | 3.02  | SE | 1 | Cameroon |
| JD0308  |      | 15.23 | 3.01  | SE | 1 | Cameroon |
| JD0419  |      | 14.83 | 3.94  | SE | 1 | Cameroon |
| JD0429  |      | 14.83 | 3.95  | SE | 1 | Cameroon |
| JD0443  |      | 14.82 | 3.96  | SE | 1 | Cameroon |
| LD0057  |      | 12.72 | 3.33  | SE | 1 | Cameroon |
| LD0128  |      | 12.72 | 3.33  | SE | 1 | Cameroon |
| LD0142  |      | 12.72 | 3.33  | SE | 1 | Cameroon |
| MH1301  | 694  | 12.40 | 2.80  | SE | 1 | Cameroon |
| MH1318  | 710  | 12.40 | 2.80  | SE | 1 | Cameroon |
| MH1376  | 648  | 13.08 | 2.77  | SE | 1 | Cameroon |
| MH1415  | 628  | 13.42 | 2.37  | SE | 1 | Cameroon |
| MH1422  | 643  | 13.42 | 2.37  | SE | 1 | Cameroon |
| MH1425  | 665  | 13.42 | 2.37  | SE | 1 | Cameroon |
| MH1439  | 667  | 13.43 | 2.37  | SE | 1 | Cameroon |
| MH2080  | 638  | 13.09 | 2.76  | SE | 1 | Cameroon |
| MH2086  | 618  | 13.43 | 2.37  | SE | 1 | Cameroon |
| MH2087  |      | 13.43 | 2.37  | SE | 1 | Cameroon |
| OH0119  | 483  | 12.80 | 0.51  | SE | 1 | Gabon    |
| OH1166  |      | 13.84 | 3.81  | SE | 1 | Cameroon |
| OH1214  |      | 13.83 | 3.44  | SE | 1 | Cameroon |
| OH2757  | 673  | 11.33 | 0.98  | SE | 1 | Gabon    |
| RM0006  |      | 13.12 | -0.32 | SE | 1 | Gabon    |
| RM0008  |      | 13.14 | -0.29 | SE | 1 | Gabon    |
| RM0018  |      | 11.99 | 1.65  | SE | 1 | Gabon    |
| RM0019  |      | 12.07 | 0.58  | SE | 1 | Gabon    |
| RM0030  |      | 13.11 | -0.30 | SE | 1 | Gabon    |
| SD2102  | 1001 | 11.77 | -1.62 | SE | 1 | Gabon    |
| GiD0412 | 123  | 10.30 | -1.43 | SE | 2 | Gabon    |

## Piñeiro et al. Population fragmentation of two African trees during the Ice Ages

|          |      |       |       |    |    |                                 |
|----------|------|-------|-------|----|----|---------------------------------|
| GiD0864  | 500  | 12.81 | 1.50  | SE | 2  | Gabon                           |
| GiD1696  | 413  | 11.41 | -3.41 | SE | 2  | Gabon                           |
| GiD0058  | 623  | 11.29 | -1.23 | SE | 2  | Gabon                           |
| GiD0375  | 623  | 10.28 | -1.42 | SE | 2  | Gabon                           |
| GiD0860  | 168  | 10.19 | 0.45  | SE | 2  | Gabon                           |
| GiD1207  |      | 11.78 | -0.37 | SE | 2  | Gabon                           |
| LD0037   | 613  | 12.72 | 3.33  | SE | 2  | Cameroon                        |
| OH1583   | 54   | 10.16 | -2.76 | SE | 2  | Gabon                           |
| OH1595   | 52   | 10.18 | -2.38 | SE | 2  | Gabon                           |
| OH1597   | 162  | 10.19 | -2.39 | SE | 2  | Gabon                           |
| OH2689   | 518  | 10.94 | 1.00  | SE | 2  | Gabon                           |
| OH2700   | 500  | 10.97 | 0.97  | SE | 2  | Gabon                           |
| OH2719   | 552  | 10.97 | 0.97  | SE | 2  | Gabon                           |
| OH2744   | 558  | 11.33 | 0.98  | SE | 2  | Gabon                           |
| SD2394   | 318  | 12.58 | -0.97 | SE | 2  | Gabon                           |
| SD2466   | 500  | 12.79 | 0.46  | SE | 2  | Gabon                           |
| OH1056   | 500  | 14.98 | 2.98  | SE | 1b | Cameroon                        |
| OH1059   | 478  | 15.00 | 2.94  | SE | 1b | Cameroon                        |
| GiD0480  |      | 25.34 | 0.29  | SE | 1f | Democratic Republic of<br>Congo |
| BS0069   | 798  | 13.96 | 2.20  | SE | 1f | Cameroon                        |
| BS0070   | 818  | 13.96 | 2.23  | SE | 1f | Cameroon                        |
| BS0071   | 684  | 13.95 | 2.24  | SE | 1f | Cameroon                        |
| GiD0479  |      | 25.29 | 0.30  | SE | 1f | Democratic Republic of<br>Congo |
| GK0201   | 653  | 13.22 | 1.12  | SE | 1f | Gabon                           |
| GK0302   | 1026 | 13.21 | 1.13  | SE | 1f | Gabon                           |
| JD0503   |      | 14.17 | 4.71  | SE | 1f | Cameroon                        |
| JD0509   |      | 14.17 | 4.71  | SE | 1f | Cameroon                        |
| JD0515   |      | 14.17 | 4.72  | SE | 1f | Cameroon                        |
| JD0521   |      | 14.17 | 4.72  | SE | 1f | Cameroon                        |
| JD0526   |      | 14.16 | 4.72  | SE | 1f | Cameroon                        |
| OH1589   | 6    | 10.15 | -2.77 | SE | 2d | Gabon                           |
| GK0340   | 510  | 12.57 | 0.29  | SE | 2e | Gabon                           |
| GiD0682  | 332  | 12.36 | -0.07 | SE | 2f | Gabon                           |
| GiD1737  | 146  | 10.60 | -0.72 | SE |    | Gabon                           |
| OH2901   | 359  | 11.51 | 0.51  | SE |    | Gabon                           |
| RM0009   |      | 13.14 | -0.29 | SE |    | Gabon                           |
| JD0816   |      | 13.67 | 3.42  | SE |    | Cameroon                        |
| OH2637   | 605  | 10.35 | 0.71  | SE |    | Gabon                           |
| ACL12068 | 453  | 13.35 | -5.51 | SE |    | Democratic Republic of<br>Congo |
| OH2948   | 425  | 11.19 | 0.51  | SE |    | Gabon                           |
| RP0008   | 551  | 14.27 | 3.21  | SE |    | Cameroon                        |
| BS0082   | 660  | 13.57 | 3.08  | SE |    | Cameroon                        |
| BS0085   | 636  | 13.81 | 3.10  | SE |    | Cameroon                        |
| BS0137   | 802  | 15.43 | 3.87  | SE |    | Cameroon                        |
| BS0138   | 591  | 13.77 | 3.04  | SE |    | Cameroon                        |
| CD0749   |      | 10.58 | -1.41 | SE |    | Gabon                           |



**Piñeiro et al. Population fragmentation of two African trees during the Ice Ages**

|         |     |       |       |    |          |
|---------|-----|-------|-------|----|----------|
| CD0768  |     | 10.57 | -1.40 | SE | Gabon    |
| GiD0018 | 730 | 11.37 | -1.61 | SE | Gabon    |
| GiD0106 | 600 | 11.29 | -1.23 | SE | Gabon    |
| GiD0110 | 680 | 11.28 | -1.23 | SE | Gabon    |
| GiD1205 | 490 | 12.72 | -1.35 | SE | Gabon    |
| GiD1730 | 126 | 10.60 | -0.76 | SE | Gabon    |
| GK0123  | 501 | 12.79 | 0.52  | SE | Gabon    |
| GK0176  | 753 | 12.80 | 0.51  | SE | Gabon    |
| JD0284  |     | 15.22 | 3.02  | SE | Cameroon |
| JD0453  |     | 14.44 | 3.96  | SE | Cameroon |
| JD0568  |     | 13.90 | 3.80  | SE | Cameroon |
| JD0818  |     | 13.80 | 3.23  | SE | Cameroon |
| JV0201  | 730 | 13.52 | 3.57  | SE | Cameroon |
| JV0207  | 730 | 13.52 | 3.57  | SE | Cameroon |
| JV0209  | 730 | 13.52 | 3.57  | SE | Cameroon |
| JV0210  | 650 | 14.13 | 3.35  | SE | Cameroon |
| JV0211  | 650 | 14.14 | 3.34  | SE | Cameroon |
| JV0212  | 650 | 14.14 | 3.34  | SE | Cameroon |
| JV0213  | 650 | 14.14 | 3.34  | SE | Cameroon |
| JV0214  | 650 | 14.14 | 3.34  | SE | Cameroon |
| JV0215  | 650 | 14.14 | 3.34  | SE | Cameroon |
| JV0216  | 650 | 14.14 | 3.34  | SE | Cameroon |
| JV0217  | 650 | 14.15 | 3.34  | SE | Cameroon |
| JV0218  | 650 | 14.15 | 3.34  | SE | Cameroon |
| JV0219  | 650 | 14.15 | 3.34  | SE | Cameroon |
| JV0220  | 650 | 14.15 | 3.34  | SE | Cameroon |
| JV0221  | 650 | 14.16 | 3.34  | SE | Cameroon |
| JV0222  | 650 | 14.16 | 3.34  | SE | Cameroon |
| JV0223  | 650 | 14.16 | 3.34  | SE | Cameroon |
| JV0224  | 650 | 14.16 | 3.34  | SE | Cameroon |
| JV0225  | 650 | 14.16 | 3.34  | SE | Cameroon |
| JV0226  | 650 | 14.16 | 3.34  | SE | Cameroon |
| JV0227  | 650 | 14.16 | 3.34  | SE | Cameroon |
| JV0228  | 650 | 14.16 | 3.34  | SE | Cameroon |
| JV0229  | 650 | 14.16 | 3.34  | SE | Cameroon |
| JV0230  | 650 | 14.16 | 3.34  | SE | Cameroon |
| JV0231  | 650 | 14.16 | 3.34  | SE | Cameroon |
| JV0232  | 650 | 14.16 | 3.34  | SE | Cameroon |
| JV0233  | 650 | 14.16 | 3.34  | SE | Cameroon |
| JV0234  | 650 | 14.17 | 3.34  | SE | Cameroon |
| JV0235  | 650 | 14.17 | 3.34  | SE | Cameroon |
| JV0236  | 650 | 14.17 | 3.34  | SE | Cameroon |
| JV0237  | 650 | 14.17 | 3.34  | SE | Cameroon |
| JV0238  | 650 | 14.17 | 3.34  | SE | Cameroon |
| MH0784  | 409 | 13.88 | -1.86 | SE | Gabon    |
| MH1295  | 690 | 12.40 | 2.80  | SE | Cameroon |

## Piñeiro et al. Population fragmentation of two African trees during the Ice Ages

|        |     |       |      |    |          |
|--------|-----|-------|------|----|----------|
| MH1869 |     | 10.58 | 3.12 | SE | Cameroon |
| OH1012 | 517 | 14.92 | 3.18 | SE | Cameroon |
| OH1033 | 481 | 14.96 | 3.09 | SE | Cameroon |
| OH1180 |     | 13.55 | 3.87 | SE | Cameroon |
| OH1182 |     | 13.84 | 3.40 | SE | Cameroon |
| OH1183 |     | 13.83 | 3.40 | SE | Cameroon |
| OH1187 |     | 13.56 | 3.83 | SE | Cameroon |
| OH1189 |     | 13.83 | 3.45 | SE | Cameroon |
| OH1193 |     | 13.84 | 3.46 | SE | Cameroon |
| OH1196 |     | 13.82 | 3.43 | SE | Cameroon |
| OH1202 |     | 13.83 | 3.43 | SE | Cameroon |
| OH2984 | 481 | 11.11 | 0.58 | SE | Gabon    |
| OH3081 | 236 | 11.01 | 0.00 | SE | Gabon    |
| RP0001 | 538 | 14.27 | 3.22 | SE | Cameroon |
| RP0058 | 560 | 14.27 | 3.21 | SE | Cameroon |
| RP0060 | 560 | 14.27 | 3.21 | SE | Cameroon |
| RP0075 | 572 | 14.27 | 3.22 | SE | Cameroon |
| RP0077 | 574 | 14.27 | 3.22 | SE | Cameroon |
| RP0133 | 571 | 14.25 | 3.19 | SE | Cameroon |
| RP0175 | 560 | 14.22 | 3.16 | SE | Cameroon |
| RP0225 | 605 | 14.22 | 3.16 | SE | Cameroon |
| RP0234 | 587 | 14.22 | 3.17 | SE | Cameroon |
| RP0271 | 552 | 14.22 | 3.16 | SE | Cameroon |
| RP0285 | 567 | 14.22 | 3.16 | SE | Cameroon |
| RP0286 | 567 | 14.22 | 3.16 | SE | Cameroon |
| RP0293 | 561 | 14.27 | 3.21 | SE | Cameroon |
| RP0294 | 565 | 14.27 | 3.21 | SE | Cameroon |
| RP0301 | 569 | 14.27 | 3.21 | SE | Cameroon |
| RP0320 | 569 | 14.27 | 3.21 | SE | Cameroon |
| RP0322 | 569 | 14.27 | 3.21 | SE | Cameroon |
| RP0326 | 564 | 14.27 | 3.21 | SE | Cameroon |
| RP0329 | 560 | 14.27 | 3.21 | SE | Cameroon |
| RP0331 | 563 | 14.27 | 3.21 | SE | Cameroon |
| RP0337 | 562 | 14.27 | 3.21 | SE | Cameroon |
| RP0345 | 584 | 14.11 | 3.17 | SE | Cameroon |
| RP0368 | 581 | 14.12 | 3.18 | SE | Cameroon |
| RP0369 | 579 | 14.12 | 3.18 | SE | Cameroon |
| RP0382 | 596 | 14.11 | 3.18 | SE | Cameroon |
| RP0401 | 584 | 14.11 | 3.17 | SE | Cameroon |
| RP0413 | 598 | 14.11 | 3.17 | SE | Cameroon |
| RP0414 | 596 | 14.11 | 3.17 | SE | Cameroon |
| RP0441 | 595 | 14.11 | 3.17 | SE | Cameroon |
| RP0447 | 591 | 14.05 | 3.20 | SE | Cameroon |
| RP0449 | 605 | 14.05 | 3.20 | SE | Cameroon |
| RP0454 | 598 | 14.05 | 3.20 | SE | Cameroon |
| RP0479 | 568 | 14.05 | 3.21 | SE | Cameroon |

**Piñeiro et al. Population fragmentation of two African trees during the Ice Ages**

|         |     |       |       |    |    |                                 |
|---------|-----|-------|-------|----|----|---------------------------------|
| RP0565  | 607 | 14.08 | 4.10  | SE |    | Cameroon                        |
| SVO0150 |     | 13.37 | 2.78  | SE |    | Cameroon                        |
| SVO0197 |     | 13.27 | 2.65  | SE |    | Cameroon                        |
| TS0130  | 738 | 12.24 | -2.05 | SE |    | Gabon                           |
| TS0132  | 756 | 12.20 | -2.04 | SE |    | Gabon                           |
| GiD0395 | 127 | 10.31 | -1.42 |    | 1  | Gabon                           |
| BS0067  | 672 | 13.94 | 2.24  |    | 2  | Cameroon                        |
| GiD0483 |     | 25.29 | 0.29  |    | 2  | Democratic Republic of<br>Congo |
| BS0084  | 486 | 11.38 | 4.98  |    | 1a | Cameroon                        |
| MH1375  | 619 | 13.09 | 2.77  |    | 1  | Cameroon                        |
| MH1383  | 614 | 13.08 | 2.78  |    | 1  | Cameroon                        |
| MH1498  | 570 | 11.13 | 2.83  |    | 1  | Cameroon                        |
| OH2586  | 77  | 10.17 | 0.49  |    | 1  | Gabon                           |
| SVO0107 |     | 12.98 | 2.73  |    | 1  | Cameroon                        |
| TOD0598 |     | 10.66 | 3.46  |    | 1  | Cameroon                        |
| GK0002  |     | 11.22 | -1.11 |    | 2  | Gabon                           |
| GK0007  |     | 11.22 | -1.11 |    | 2  | Gabon                           |
| OH1303  | 472 | 10.53 | 3.18  |    | 1d | Cameroon                        |
| NB0287  | 460 | 25.32 | 0.29  |    | 1f | Democratic Republic of<br>Congo |
| NB0288  | 450 | 25.31 | 0.29  |    | 1f | Democratic Republic of<br>Congo |
| NB0290  | 475 | 24.48 | 0.80  |    | 1f | Democratic Republic of<br>Congo |
| GiD1661 | 73  | 11.16 | -3.66 |    | 2a | Gabon                           |
| GiD1662 | 46  | 11.16 | -3.66 |    | 2a | Gabon                           |

| Voucher           | Elevation | Latitude | Longitude | nSSR | cpDNA | Country  |
|-------------------|-----------|----------|-----------|------|-------|----------|
| <i>S. zenkeri</i> |           |          |           |      |       |          |
| GiD0610           | 397       | -0.86    | 11.26     | NW   | 1     | Gabon    |
| GiD1269           |           | -4.00    | 11.80     | NW   |       | CongoB   |
| GiD1632           |           | 2.53     | 10.63     | NW   | 4     | Cameroon |
| MH1627            | 478       | 2.79     | 10.54     | NW   | 4     | Cameroon |
| MH1631            | 489       | 2.79     | 10.54     | NW   | 4     | Cameroon |
| MH1632            | 453       | 2.79     | 10.53     | NW   | 4     | Cameroon |
| MH1912            | 753       | 3.26     | 10.91     | NW   | 4     | Cameroon |
| MH1921            | 82        | 3.11     | 10.47     | NW   | 4     | Cameroon |
| MH2663            | 473       | 3.35     | 10.76     | NW   | 4     | Cameroon |
| MH2667            | 488       | 3.35     | 10.75     | NW   | 4     | Cameroon |
| MH2675            | 491       | 3.35     | 10.74     | NW   | 4     | Cameroon |
| MH2678            | 465       | 3.34     | 10.74     | NW   | 4     | Cameroon |
| MH2682            | 490       | 3.34     | 10.74     | NW   | 4     | Cameroon |
| MH2684            | 507       | 3.34     | 10.74     | NW   | 4     | Cameroon |
| OH0883            | 640       | 2.75     | 10.54     | NW   | 4     | Cameroon |
| OH2907            | 354       | 0.51     | 11.51     | NW   | 1     | Gabon    |
| OL0666            | 465       | 2.76     | 10.54     | NW   | 4a    | Cameroon |
| OL0833            | 59        | 3.33     | 10.17     | NW   | 4     | Cameroon |
| RM0049            |           | 0.70     | 11.56     | NW   | 1     | Gabon    |
| RM0155            |           | 0.71     | 11.64     | NW   | 1     | Gabon    |

## Piñeiro et al. Population fragmentation of two African trees during the Ice Ages

|         |     |       |       |       |    |                              |
|---------|-----|-------|-------|-------|----|------------------------------|
| TOD0449 |     | 4.56  | 10.47 | NW    | 4  | Cameroon                     |
| TOD0567 |     | 3.39  | 10.43 | NW    | 4  | Cameroon                     |
| TOD0661 |     | 3.24  | 10.58 | NW    | 4  | Cameroon                     |
| TOD0696 |     | 3.22  | 10.58 | NW    | 4  | Cameroon                     |
| GiD0477 |     | 0.30  | 25.29 | CONGO | 9  | Democratic Republic of Congo |
| GiD0478 |     | 0.30  | 25.31 | CONGO | 9  | Democratic Republic of Congo |
| GiD0486 |     | 0.29  | 25.31 | CONGO | 9  | Democratic Republic of Congo |
| GiD0487 |     | 0.30  | 25.31 | CONGO | 9  | Democratic Republic of Congo |
| GiD0494 |     | 0.30  | 25.31 | CONGO |    | Democratic Republic of Congo |
| GiD0506 |     | 0.30  | 25.31 | CONGO |    | Democratic Republic of Congo |
| GiD0568 |     | 0.29  | 25.31 | CONGO |    | Democratic Republic of Congo |
| JFB0010 |     | -2.60 | 16.48 | CONGO |    | Democratic Republic of Congo |
| JFB0011 |     | -2.60 | 16.48 | CONGO |    | Democratic Republic of Congo |
| MH1430  | 609 | 2.37  | 13.43 | CONGO | 1  | Cameroon                     |
| NB0073  | 475 | 0.80  | 24.48 | CONGO | 9  | Democratic Republic of Congo |
| NB0083  | 470 | 0.81  | 24.48 | CONGO | 9  | Democratic Republic of Congo |
| NB0089  | 460 | 0.80  | 24.48 | CONGO | 9  | Democratic Republic of Congo |
| NB0123  | 450 | 0.29  | 25.32 | CONGO | 9  | Democratic Republic of Congo |
| NB0132  | 415 | 0.29  | 25.30 | CONGO |    | Democratic Republic of Congo |
| NB0145  | 430 | 0.29  | 25.30 | CONGO |    | Democratic Republic of Congo |
| NB0148  | 445 | 0.29  | 25.30 | CONGO | 9  | Democratic Republic of Congo |
| NB0149  | 435 | 0.29  | 25.30 | CONGO |    | Democratic Republic of Congo |
| NB0164  | 475 | 0.81  | 24.49 | CONGO |    | Democratic Republic of Congo |
| NB0172  | 475 | 0.81  | 24.49 | CONGO |    | Democratic Republic of Congo |
| NB0259  | 445 | 0.80  | 24.48 | CONGO |    | Democratic Republic of Congo |
| NB0264  | 470 | 0.80  | 24.49 | CONGO | 9  | Democratic Republic of Congo |
| NB0276  | 460 | 0.80  | 24.48 | CONGO | 9  | Democratic Republic of Congo |
| NB0279  | 440 | 0.29  | 25.30 | CONGO | 9  | Democratic Republic of Congo |
| NB0280  | 450 | 0.29  | 25.31 | CONGO | 9  | Democratic Republic of Congo |
| NB0281  | 450 | 0.29  | 25.32 | CONGO | 9  | Democratic Republic of Congo |
| NB0282  | 450 | 0.29  | 25.32 | CONGO | 9  | Democratic Republic of Congo |
| NB0283  | 450 | 0.29  | 25.31 | CONGO |    | Democratic Republic of Congo |
| NB0292  | 470 | 0.80  | 24.49 | CONGO |    | Democratic Republic of Congo |
| CD0759  |     | -1.41 | 10.57 | WEST  | 5  | Gabon                        |
| CD0765  |     | -1.40 | 10.57 | WEST  | 5  | Gabon                        |
| GiD0167 | 400 | 0.40  | 11.23 | WEST  | 1  | Gabon                        |
| GiD0195 | 380 | 0.40  | 11.23 | WEST  | 1  | Gabon                        |
| GiD0462 | 47  | 0.45  | 10.18 | WEST  |    | Gabon                        |
| GiD0472 | 50  | 0.45  | 10.18 | WEST  | 1c | Gabon                        |
| GiD0604 | 194 | -0.09 | 10.76 | WEST  | 1  | Gabon                        |
| GiD0606 | 423 | -0.87 | 11.26 | WEST  |    | Gabon                        |
| GiD0611 | 375 | -0.85 | 11.26 | WEST  |    | Gabon                        |
| GiD0613 | 379 | -0.86 | 11.26 | WEST  |    | Gabon                        |
| GiD0615 | 206 | -0.09 | 10.76 | WEST  | 1  | Gabon                        |
| GiD0791 |     | 0.43  | 11.21 | WEST  |    | Gabon                        |
| GiD0882 | 159 | 0.45  | 10.19 | WEST  | 1c | Gabon                        |

## Piñeiro et al. Population fragmentation of two African trees during the Ice Ages

|         |     |       |       |      |    |       |
|---------|-----|-------|-------|------|----|-------|
| GiD0886 | 59  | 0.45  | 10.19 | WEST | 1c | Gabon |
| GiD0887 | 74  | 0.45  | 10.19 | WEST | 1c | Gabon |
| GiD0950 | 37  | 0.45  | 10.19 | WEST | 1c | Gabon |
| GiD0996 | 260 | 0.45  | 10.20 | WEST |    | Gabon |
| GiD0997 | 314 | 0.45  | 10.20 | WEST | 1c | Gabon |
| GiD1001 | 109 | 0.46  | 10.19 | WEST | 1c | Gabon |
| GiD1002 | 88  | 0.46  | 10.19 | WEST |    | Gabon |
| GiD1146 |     | 0.46  | 10.28 | WEST |    | Gabon |
| GiD1267 |     | 0.22  | 10.92 | WEST | 1  | Gabon |
| GiD1716 | 76  | -0.77 | 10.54 | WEST |    | Gabon |
| GK0046  | 369 | 0.47  | 10.27 | WEST |    | Gabon |
| GK0047  | 147 | 0.48  | 10.27 | WEST |    | Gabon |
| GK0048  | 528 | 0.48  | 10.27 | WEST |    | Gabon |
| GK0049  | 537 | 0.47  | 10.27 | WEST |    | Gabon |
| MH0740  | 712 | -1.61 | 12.27 | WEST | 1  | Gabon |
| MH0851  | 311 | -1.09 | 12.31 | WEST | 1  | Gabon |
| OH2697  | 493 | 0.97  | 10.97 | WEST | 1  | Gabon |
| OH2702  | 498 | 0.97  | 10.97 | WEST | 1  | Gabon |
| OH2708  | 503 | 0.97  | 10.97 | WEST | 1  | Gabon |
| OH2715  | 510 | 0.97  | 10.98 | WEST |    | Gabon |
| OH2883  | 318 | 0.52  | 11.47 | WEST | 1  | Gabon |
| OH2893  | 317 | 0.53  | 11.48 | WEST | 1  | Gabon |
| OH2923  | 309 | 0.28  | 11.19 | WEST | 1  | Gabon |
| OH2930  | 227 | 0.31  | 11.20 | WEST | 1  | Gabon |
| OH2936  | 221 | 0.31  | 11.20 | WEST | 1  | Gabon |
| OH2940  | 350 | 0.39  | 11.19 | WEST | 1  | Gabon |
| OH3048  | 311 | 0.30  | 11.20 | WEST | 1  | Gabon |
| OH3054  | 290 | 0.30  | 11.20 | WEST | 1  | Gabon |
| OH3092  | 121 | -0.06 | 10.98 | WEST | 1  | Gabon |
| OH3111  | 117 | -0.16 | 10.63 | WEST | 1  | Gabon |
| OH3120  | 77  | -0.21 | 10.56 | WEST | 1d | Gabon |
| SD2178  | 181 | -0.08 | 10.75 | WEST | 1b | Gabon |
| TS0096  | 755 | 0.48  | 10.50 | WEST | 3  | Gabon |
| TS0100  | 755 | 0.48  | 10.50 | WEST |    | Gabon |
| TS0105  | 750 | 0.48  | 10.50 | WEST |    | Gabon |
| TS0106  | 735 | 0.48  | 10.50 | WEST |    | Gabon |
| TS0149  | 780 | -2.04 | 12.22 | WEST | 5  | Gabon |
| TS0166  | 430 | 0.57  | 10.95 | WEST | 1  | Gabon |
| CD0313  |     | -1.91 | 10.74 | SW   | 5  | Gabon |
| CD0526  |     | -3.29 | 11.14 | SW   | 9a | Gabon |
| CD0541  |     | -3.29 | 11.13 | SW   | 9a | Gabon |
| GiD0407 | 500 | -1.44 | 10.29 | SW   | 5  | Gabon |
| GiD0417 | 623 | -1.42 | 10.28 | SW   | 5  | Gabon |
| GiD0418 | 476 | -1.43 | 10.28 | SW   | 5  | Gabon |
| GiD0609 | 410 | -0.86 | 11.28 | SW   | 1  | Gabon |
| GiD0612 | 423 | -0.87 | 11.26 | SW   |    | Gabon |

## Piñeiro et al. Population fragmentation of two African trees during the Ice Ages

|         |     |       |       |    |    |                              |
|---------|-----|-------|-------|----|----|------------------------------|
| GiD0614 | 206 | -0.09 | 10.76 | SW | 1  | Gabon                        |
| GiD0616 | 376 | -0.85 | 11.26 | SW | 1  | Gabon                        |
| GiD0793 | 347 | -0.85 | 11.26 | SW | 1  | Gabon                        |
| GiD0794 | 427 | -0.85 | 11.26 | SW | 1  | Gabon                        |
| GiD0795 | 370 | -0.85 | 11.27 | SW | 1  | Gabon                        |
| GiD0796 | 370 | -0.85 | 11.27 | SW |    | Gabon                        |
| GiD0797 | 373 | -0.85 | 11.27 | SW | 1  | Gabon                        |
| GiD0894 |     | -3.28 | 11.12 | SW | 9a | Gabon                        |
| GiD0895 | 475 | -3.28 | 11.12 | SW | 9a | Gabon                        |
| GiD0999 | 133 | 0.46  | 10.19 | SW |    | Gabon                        |
| GiD1268 |     | -5.35 | 15.91 | SW |    | Democratic Republic of Congo |
| GiD1270 |     | -4.00 | 11.80 | SW |    | CongoB                       |
| GiD1272 |     | -5.35 | 13.00 | SW |    | Democratic Republic of Congo |
| GiD1274 | 220 | -2.68 | 10.46 | SW |    | Gabon                        |
| GiD1631 | 650 | -1.98 | 12.01 | SW | 5  | Gabon                        |
| GiD1636 | 385 | -1.11 | 11.19 | SW |    | Gabon                        |
| GiD1639 | 100 | -2.93 | 10.54 | SW | 8  | Gabon                        |
| GiD1651 | 97  | -3.65 | 11.16 | SW | 7  | Gabon                        |
| GiD1675 | 98  | -3.64 | 11.16 | SW | 7  | Gabon                        |
| GiD1715 | 100 | -0.77 | 10.54 | SW |    | Gabon                        |
| MH0737  | 713 | -1.62 | 12.27 | SW | 1  | Gabon                        |
| MH0753  | 675 | -1.62 | 12.28 | SW | 1  | Gabon                        |
| MH0955  | 253 | -2.67 | 11.25 | SW | 6  | Gabon                        |
| MH0968  | 416 | -2.68 | 11.25 | SW | 6  | Gabon                        |
| MH0971  | 374 | -2.68 | 11.25 | SW | 6  | Gabon                        |
| MH0996  | 386 | -2.64 | 11.25 | SW | 6  | Gabon                        |
| OH1630  | 34  | -2.38 | 10.17 | SW | 2  | Gabon                        |
| OH1631  | 43  | -2.38 | 10.17 | SW | 2  | Gabon                        |
| OH1632  | 43  | -2.38 | 10.18 | SW | 2  | Gabon                        |
| OH2005  | 292 | -0.73 | 12.97 | SW |    | Gabon                        |
| TOD0665 |     | 3.24  | 10.58 | SW | 4  | Cameroon                     |
| TS0138  | 750 | -2.04 | 12.22 | SW |    | Gabon                        |
| TS0139  | 756 | -2.04 | 12.22 | SW | 5  | Gabon                        |
| TS0140  | 770 | -2.04 | 12.23 | SW |    | Gabon                        |
| TS0141  | 750 | -2.04 | 12.24 | SW |    | Gabon                        |
| TS0142  | 750 | -2.04 | 12.20 | SW |    | Gabon                        |
| TS0143  | 760 | -2.04 | 12.20 | SW |    | Gabon                        |
| TS0144  | 745 | -2.04 | 12.20 | SW |    | Gabon                        |
| TS0145  | 755 | -2.04 | 12.20 | SW |    | Gabon                        |
| TS0146  | 725 | -2.04 | 12.24 | SW | 5  | Gabon                        |
| TS0147  | 780 | -2.04 | 12.23 | SW |    | Gabon                        |
| TS0148  | 765 | -2.04 | 12.23 | SW | 5  | Gabon                        |
| TS0150  | 775 | -2.04 | 12.22 | SW |    | Gabon                        |
| GiD0603 | 448 | -0.06 | 12.35 | E  | 1d | Gabon                        |
| GiD0605 | 311 | -0.08 | 12.37 | E  |    | Gabon                        |
| GiD0607 | 309 | -0.08 | 12.35 | E  | 1d | Gabon                        |

## Piñeiro et al. Population fragmentation of two African trees during the Ice Ages

|         |     |       |       |   |    |       |
|---------|-----|-------|-------|---|----|-------|
| GiD0608 | 334 | -0.85 | 11.28 | E |    | Gabon |
| GiD0792 | 351 | -0.07 | 12.36 | E |    | Gabon |
| GiD0798 | 411 | -0.06 | 12.36 | E |    | Gabon |
| GiD0799 | 309 | -0.08 | 12.35 | E | 1d | Gabon |
| GiD0800 | 332 | -0.08 | 12.36 | E | 1d | Gabon |
| GiD0942 | 481 | 1.49  | 12.80 | E | 1  | Gabon |
| GiD0946 | 481 | 1.49  | 12.80 | E | 1  | Gabon |
| GiD0963 | 528 | 1.49  | 12.81 | E | 1  | Gabon |
| GiD0968 | 500 | 1.50  | 12.81 | E | 1  | Gabon |
| GiD1006 | 493 | 1.49  | 12.81 | E | 1  | Gabon |
| GiD1007 | 528 | 1.49  | 12.81 | E | 1  | Gabon |
| GiD1041 | 484 | 1.13  | 13.02 | E |    | Gabon |
| GiD1214 | 387 | -0.24 | 12.74 | E | 1b | Gabon |
| GiD1215 | 387 | -0.24 | 12.73 | E | 1b | Gabon |
| GiD1217 | 390 | -0.24 | 12.74 | E | 1b | Gabon |
| GiD1218 | 430 | -0.27 | 12.73 | E | 1b | Gabon |
| GiD1219 | 279 | -0.84 | 12.60 | E | 1  | Gabon |
| GiD1221 | 392 | -0.70 | 12.55 | E | 1  | Gabon |
| GiD1222 | 394 | -0.24 | 12.73 | E | 1b | Gabon |
| GiD1223 | 490 | -1.35 | 12.72 | E | 1b | Gabon |
| GiD1224 | 562 | -1.34 | 12.71 | E | 1b | Gabon |
| GiD1225 | 533 | -1.34 | 12.72 | E | 1b | Gabon |
| GiD1226 | 513 | -1.35 | 12.72 | E | 1b | Gabon |
| GiD1621 | 750 | 0.83  | 13.48 | E | 1  | Gabon |
| GiD1624 |     | -0.80 | 12.83 | E | 1  | Gabon |
| GiD1627 |     | 0.52  | 12.82 | E | 1  | Gabon |
| GiD1633 |     | -0.68 | 11.93 | E |    | Gabon |
| GiD1637 | 280 | -0.74 | 12.97 | E | 1b | Gabon |
| GiD1638 |     | -0.67 | 13.00 | E | 1b | Gabon |
| GK0121  | 502 | 0.52  | 12.79 | E |    | Gabon |
| GK0183  | 744 | 1.11  | 13.21 | E |    | Gabon |
| GK0191  | 621 | 1.12  | 13.22 | E |    | Gabon |
| GK0193  | 640 | 1.12  | 13.22 | E |    | Gabon |
| GK0204  | 680 | 1.12  | 13.22 | E |    | Gabon |
| GK0208  | 878 | 1.12  | 13.22 | E | 1b | Gabon |
| GK0219  | 946 | 1.11  | 13.21 | E | 1b | Gabon |
| GK0222  | 912 | 1.11  | 13.21 | E | 1b | Gabon |
| GK0231  | 742 | 1.11  | 13.21 | E | 1b | Gabon |
| GK0246  | 761 | 1.11  | 13.22 | E |    | Gabon |
| GK0258  | 755 | 1.11  | 13.22 | E | 1b | Gabon |
| GK0289  | 794 | 1.13  | 13.20 | E | 1b | Gabon |
| GK0316  | 476 | 0.29  | 12.57 | E | 1  | Gabon |
| GK0326  | 489 | 0.29  | 12.57 | E | 1  | Gabon |
| GK0354  | 484 | 0.29  | 12.57 | E |    | Gabon |
| GK0368  | 479 | 0.29  | 12.57 | E |    | Gabon |
| GK0373  | 507 | 0.29  | 12.57 | E | 1  | Gabon |

## Piñeiro et al. Population fragmentation of two African trees during the Ice Ages

|         |      |       |       |   |    |          |
|---------|------|-------|-------|---|----|----------|
| MH0743  | 714  | -1.61 | 12.27 | E | 1  | Gabon    |
| MH0750  | 711  | -1.61 | 12.28 | E | 1  | Gabon    |
| MH0852  | 311  | -1.09 | 12.31 | E |    | Gabon    |
| MH0873  | 319  | -1.06 | 12.30 | E | 1  | Gabon    |
| MH0884  | 308  | -1.06 | 12.30 | E | 1d | Gabon    |
| MH0898  | 309  | -1.06 | 12.30 | E | 1d | Gabon    |
| MH1410  | 630  | 2.37  | 13.42 | E | 1  | Cameroon |
| MH1411  | 630  | 2.37  | 13.42 | E | 1  | Cameroon |
| MH1419  | 641  | 2.37  | 13.42 | E | 1  | Cameroon |
| MH2188  | 653  | 2.37  | 13.42 | E | 1  | Cameroon |
| OH0114  | 524  | 0.01  | 12.80 | E | 1  | Gabon    |
| OH2002  | 272  | -0.73 | 12.97 | E | 1b | Gabon    |
| OH2003  | 264  | -0.73 | 12.97 | E | 1b | Gabon    |
| OH2004  | 272  | -0.73 | 12.97 | E | 1b | Gabon    |
| OH2006  | 286  | -0.73 | 12.97 | E |    | Gabon    |
| OH2879  | 346  | 0.53  | 11.47 | E | 1  | Gabon    |
| RM0031  |      | 0.57  | 12.05 | E | 1  | Gabon    |
| RM0033  |      | 0.57  | 12.06 | E | 1  | Gabon    |
| RM0034  |      | 0.58  | 12.08 | E | 1  | Gabon    |
| RM0036  |      | 0.58  | 12.07 | E | 1  | Gabon    |
| RM0037  |      | -0.42 | 12.87 | E | 1b | Gabon    |
| RM0039  |      | -0.42 | 12.85 | E | 1b | Gabon    |
| RM0044  |      | -0.41 | 12.87 | E | 1b | Gabon    |
| RM0045  |      | -0.30 | 13.11 | E | 1b | Gabon    |
| RM0047  |      | -0.30 | 13.11 | E | 1b | Gabon    |
| RM0048  |      | -0.30 | 13.10 | E | 1b | Gabon    |
| RM0050  |      | -0.42 | 12.87 | E | 1b | Gabon    |
| SD2254  | 496  | -1.31 | 13.03 | E | 1  | Gabon    |
| SD2262  | 535  | -1.09 | 12.89 | E | 1  | Gabon    |
| SD2276  | 606  | -1.00 | 12.83 | E | 1a | Gabon    |
| SD2321  | 651  | -1.16 | 11.81 | E | 1  | Gabon    |
| SD2381  | 275  | -0.97 | 12.58 | E | 1  | Gabon    |
| SD2443  | 492  | 0.52  | 12.79 | E | 1  | Gabon    |
| SD2465  | 479  | 0.46  | 12.79 | E | 1  | Gabon    |
| TS0165  | 390  | 0.60  | 10.95 | E | 1  | Gabon    |
| TS0172  | 1002 | 1.07  | 13.20 | E | 1b | Gabon    |
| GiD0175 | 383  | 0.40  | 11.23 |   | 1  | Gabon    |
| GiD1103 | 130  | -1.37 | 10.87 |   | 1  | Gabon    |
| GiD1104 | 167  | -1.38 | 10.88 |   | 1  | Gabon    |
| GiD1105 | 163  | -1.39 | 10.86 |   | 1  | Gabon    |
| GiD1106 | 230  | -1.39 | 10.88 |   | 1  | Gabon    |
| GiD1107 | 778  | -3.28 | 11.12 |   | 9  | Gabon    |
| GiD1216 | 392  | -0.24 | 12.75 |   | 1b | Gabon    |
| GiD1220 | 223  | -0.72 | 12.57 |   | 1  | Gabon    |
| GiD1622 | 220  | -2.68 | 10.46 |   | 2a | Gabon    |
| GiD1623 | 420  | -0.90 | 13.85 |   | 1b | Gabon    |



## Piñeiro et al. Population fragmentation of two African trees during the Ice Ages

|         |     |       |       |    |       |
|---------|-----|-------|-------|----|-------|
| GiD1625 |     | 3.17  | 10.65 | 4  |       |
| GiD1626 |     | -2.60 | 10.58 | 1e | Gabon |
| GiD1628 |     | -2.55 | 10.58 | 1e | Gabon |
| GiD1629 |     | 3.17  | 10.65 | 4  |       |
| GiD1630 |     |       |       | 4  |       |
| GiD1640 |     | -0.60 | 12.06 | 1b | Gabon |
| MH0960  | 460 | -2.67 | 11.25 | 6  | Gabon |
| RM0041  |     | -0.30 | 13.10 | 1b | Gabon |

---

MBG, Missouri Botanical Garden Team; NATURE + ([www.natureplus.be](http://www.natureplus.be))

**Piñeiro et al. Population fragmentation of two African trees during the Ice Ages**

Table S2. Demographic analyses of  $n$ SSR data of *Scorodophloeus zenkeri* and *Greenwayodendron suaveolens*. All three scenarios of GENETIC CLUSTER DIVERGENCE were built based on the same  $F_{ST}$  distance tree between genetic clusters (Figure 1 A-B) but at three different time scales: (a1) Pleistocene divergence, [ $<2$  Myr BP]; (a2) Pliocene divergence [ $2-4$  Myr BP], and (a3) Mio/Pliocene divergence [ $4-6$  Myr BP]. All population differentiation summary statistics were used. For the BROAD TIME MODELS four scenarios were built: (b1) constant population size, (b2) decline, (b3) expansion, and (b4) bottleneck followed by expansion. Time priors were set between the beginning of the PGM and the present [ $190$  Kyr- $0$  yr BP] (Figures 2 A and B). For the NARROW TIME MODELS pure population decline scenarios were not tested because they were always rejected by previous tests. Therefore, expansion or bottleneck events were tested using three different time priors (Figures 2 A and C): (c1) null model of constant population size, (c2) bottleneck during the Penultimate Glacial Maximum, PGM [ $190-120$  Kyr BP] and/or subsequent expansion, (c3) bottleneck during the Last Glacial Maximum, LGM [ $70-10$  Kyr BP] and/or subsequent expansion, and (c4) bottleneck during the Holocene [ $4-2$  Kyr BP] and/or subsequent expansion. The M-ratio (number of alleles over range of allele size), allelic richness and heterozygosity were used.

| <b>Table S2A. GENETIC CLUSTER DIVERGENCE –<br/><i>Scorodophloeus zenkeri</i></b> |                        |           |           |           |           |          |
|----------------------------------------------------------------------------------|------------------------|-----------|-----------|-----------|-----------|----------|
| PARAMETER                                                                        | PRIOR DISTRIBUTION     | mean      | q025      | q975      | Mean Bias | Factor 2 |
| N                                                                                | Uniform (1,000-50,000) | 3.00E+004 | 1.14E+004 | 4.81E+004 | 0.277     | 1        |
| t0                                                                               | Uniform (0-20000)      | 1.09E+004 | 3.32E+003 | 1.91E+004 | 0.125     | 0.998    |
| N <sub>1</sub>                                                                   | Uniform (1,000-50,000) | 3.10E+004 | 4.93E+003 | 4.92E+004 | 0.05      | 1        |
| t1                                                                               | Uniform (0-20000)      | 6.15E+003 | 1.25E+003 | 1.58E+004 | 0.132     | 1        |
| N <sub>2</sub>                                                                   | Uniform (1,000-50,000) | 2.57E+004 | 3.52E+003 | 4.85E+004 | 0.061     | 1        |
| t2                                                                               | Uniform (0-20000)      | 1.05E+004 | 3.19E+003 | 1.91E+004 | 0.105     | 0.996    |
| N <sub>3</sub>                                                                   | Uniform (1,000-50,000) | 2.83E+004 | 3.75E+003 | 4.90E+004 | 0.068     | 1        |
| Mean $\mu$                                                                       | Logit (1E-05-1E-03)    | 1.73E-005 | 1.00E-005 | 3.82E-005 | -0.031    | 0.974    |
| Mean $P$                                                                         | Uniform (0.1-0.5)      | 3.86E-001 | 1.00E-001 | 4.94E-001 | 0.335     | 0.996    |
| Ne*Mean $\mu$                                                                    |                        | 4.87E-001 | 2.06E-001 | 9.26E-001 | 0.176     | 0.984    |
| t0*Mean $\mu$                                                                    |                        | 1.84E-001 | 5.30E-002 | 4.42E-001 | 0.081     | 0.962    |
| N <sub>1</sub> *Mean $\mu$                                                       |                        | 5.12E-001 | 9.20E-002 | 1.24E+000 | -0.002    | 0.966    |
| t1*Mean $\mu$                                                                    |                        | 1.02E-001 | 2.10E-002 | 2.92E-001 | 0.085     | 0.972    |
| N <sub>3</sub> *Mean $\mu$                                                       |                        | 4.27E-001 | 6.50E-002 | 1.08E+000 | 0.009     | 0.968    |
| t2*Mean $\mu$                                                                    |                        | 1.77E-001 | 5.10E-002 | 4.34E-001 | 0.058     | 0.962    |
| N <sub>3</sub> *Mean $\mu$                                                       |                        | 4.63E-001 | 7.30E-002 | 1.11E+000 | 0.016     | 0.968    |

***Greenwayodendron suaveolens***

| PARAMETER                  | PRIOR DISTRIBUTION     | mean     | q025     | q975     | Mean Bias | Factor 2 |
|----------------------------|------------------------|----------|----------|----------|-----------|----------|
| N                          | Uniform (1,000-50,000) | 2.44E+04 | 8.09E+03 | 4.65E+04 | 1.34E-01  | 0.95     |
| t0                         | Uniform (0-20000)      | 4.28E+03 | 8.28E+02 | 1.23E+04 | 1.87E-01  | 0.89     |
| N <sub>1</sub>             | Uniform (1,000-50,000) | 2.80E+04 | 4.17E+03 | 4.87E+04 | 6.66E-01  | 0.76     |
| t1                         | Uniform (0-20000)      | 8.44E+03 | 2.05E+03 | 1.81E+04 | 1.24E-01  | 0.89     |
| N <sub>2</sub>             | Uniform (1,000-50,000) | 3.39E+04 | 6.28E+03 | 4.94E+04 | 7.41E-01  | 0.75     |
| t2                         | Uniform (0-20000)      | 1.34E+04 | 4.92E+03 | 1.97E+04 | 2.09E-01  | 0.90     |
| N <sub>3</sub>             | Uniform (1,000-50,000) | 2.66E+04 | 3.41E+03 | 4.87E+04 | 6.97E-01  | 0.78     |
| Mean $\mu$                 | Logit (1E-05-1E-03)    | 1.38E-04 | 4.07E-05 | 3.78E-04 | 4.54E-01  | 0.78     |
| Mean $P$                   | Uniform (0.1-0.5)      | 2.49E-01 | 1.00E-01 | 4.78E-01 | 9.70E-02  | 0.93     |
| Ne*Mean $\mu$              |                        | 2.90E+00 | 1.03E+00 | 6.90E+00 | 3.66E-01  | 0.83     |
| t0*Mean $\mu$              |                        | 5.59E-01 | 8.00E-02 | 1.95E+00 | 6.05E-01  | 0.71     |
| N <sub>1</sub> *Mean $\mu$ |                        | 3.64E+00 | 5.40E-01 | 1.12E+01 | 9.04E-01  | 0.67     |
| t1*Mean $\mu$              |                        | 1.12E+00 | 2.00E-01 | 3.68E+00 | 4.79E-01  | 0.71     |
| N <sub>3</sub> *Mean $\mu$ |                        | 4.45E+00 | 8.20E-01 | 1.28E+01 | 1.12E+00  | 0.62     |
| t2*Mean $\mu$              |                        | 1.81E+00 | 4.10E-01 | 5.29E+00 | 6.03E-01  | 0.72     |
| N <sub>3</sub> *Mean $\mu$ |                        | 3.26E+00 | 5.40E-01 | 9.63E+00 | 1.22E+00  | 0.65     |

Mean mean posterior distribution; q0.25 quantile 2.5%; q9.75 quantile 97.5%

Ne, N1 effective population sizes; t1' start of PGM; t0' end of PGM.

Time priors and posterior probabilities are given in generations
