# Supplementary material
Source: PubMed Central journal article supplement (PMC5698650)
Supplement: rspb20171800supp5.pdf [file rspb20171800supp5.pdf]

## Piñeiro et al. Population fragmentation of two African trees during the Ice Ages

**Table S2B.**  
**BROAD TIME MODELS –**  
**Scorodophloeus zenkeri**

|                   |                        | NORTH WEST |          |          |       |          | WEST     |          |          |       |          | SOUTH WEST |          |          |       |          | EAST     |          |          |       |          |
|-------------------|------------------------|------------|----------|----------|-------|----------|----------|----------|----------|-------|----------|------------|----------|----------|-------|----------|----------|----------|----------|-------|----------|
| PARAMETER         | PRIOR DISTRIBUTION     | mean       | q025     | q975     | Mean  | Factor 2 | mean     | q025     | q975     | Mean  | Factor 2 | mean       | q025     | q975     | Mean  | Factor 2 | mean     | q025     | q975     | Mean  | Factor 2 |
| $N_e$             | Uniform (1,000-50,000) | 2.45E+04   | 3.36E+03 | 4.86E+04 | 0.123 | 1.000    | 2.17E+04 | 2.81E+03 | 4.77E+04 | 0.758 | 0.748    | 1.85E+04   | 3.97E+03 | 4.70E+04 | 0.936 | 0.698    | 1.83E+04 | 1.94E+03 | 4.70E+04 | 0.961 | 0.716    |
| $N_f$             | Uniform (10-500)       | 1.86E+02   | 2.40E+01 | 4.40E+02 | 0.284 | 1.000    | 2.94E+02 | 5.82E+01 | 4.90E+02 | 0.431 | 0.798    | 3.23E+02   | 4.45E+01 | 4.94E+02 | 0.847 | 0.756    | 2.79E+02 | 4.74E+01 | 4.88E+02 | 0.594 | 0.814    |
| $t_1$             | Uniform (0-1900)       | 1.46E+03   | 7.33E+02 | 1.88E+03 | 0.367 | 1.000    | 1.43E+03 | 6.17E+02 | 1.89E+03 | 0.167 | 0.912    |            |          |          |       |          | 1.45E+03 | 6.51E+02 | 1.88E+03 | 0.209 | 0.922    |
| $t_0$             | Uniform (0-1900)       | 6.54E+02   | 1.71E+02 | 1.41E+03 | 0.274 | 1.000    | 8.93E+02 | 2.04E+02 | 1.64E+03 | 1.624 | 0.646    | 9.88E+02   | 1.79E+02 | 1.85E+03 | 0.865 | 0.742    | 8.66E+02 | 1.57E+02 | 1.65E+03 | 1.319 | 0.682    |
| Mean $\mu$        | Logit (1E-05-1E-03)    | 5.97E-04   | 2.16E-04 | 9.76E-04 | 0.417 | 1.000    | 4.50E-04 | 8.56E-05 | 9.49E-04 | 0.704 | 0.586    | 5.15E-04   | 2.13E-04 | 9.42E-04 | 0.468 | 0.672    | 4.42E-04 | 8.41E-05 | 9.49E-04 | 0.728 | 0.578    |
| Mean $P$          | Uniform (0.1-0.5)      | 3.83E-01   | 2.02E-01 | 5.00E-01 | 0.106 | 0.998    | 3.25E-01 | 1.22E-01 | 4.85E-01 | 0.117 | 0.930    | 4.43E-01   | 3.31E-01 | 5.00E-01 | 0.060 | 0.972    | 3.99E-01 | 1.57E-01 | 4.97E-01 | 0.143 | 0.946    |
| $N_e$ *Mean $\mu$ |                        | 1.44E+01   | 2.04E+00 | 3.89E+01 | 0.554 | 0.954    | 8.86E+00 | 1.41E+00 | 3.16E+01 | 1.258 | 0.506    | 9.42E+00   | 1.93E+00 | 3.18E+01 | 1.464 | 0.564    | 7.05E+00 | 1.10E+00 | 2.79E+01 | 1.281 | 0.504    |
| $N_f$ *Mean $\mu$ |                        | 1.10E-01   | 1.11E-02 | 3.00E-01 | 0.812 | 0.962    | 1.31E-01 | 1.38E-02 | 3.65E-01 | 1.208 | 0.508    | 1.62E-01   | 2.26E-02 | 3.69E-01 | 0.991 | 0.676    | 1.23E-01 | 1.07E-02 | 3.53E-01 | 1.379 | 0.502    |
| $t_1$ *Mean $\mu$ |                        | 8.57E-01   | 3.12E-01 | 1.61E+00 | 0.952 | 0.6      | 6.33E-01 | 1.10E-01 | 1.51E+00 | 0.763 | 0.588    | 4.49E-01   | 1.22E-01 | 9.63E-01 | 0.346 | 0.834    | 6.26E-01 | 1.11E-01 | 1.53E+00 | 0.857 | 0.576    |
| $t_0$ *Mean $\mu$ |                        | 3.44E-01   | 1.25E-01 | 7.07E-01 | 0.798 | 0.838    | 3.48E-01 | 7.50E-02 | 8.45E-01 | 0.678 | 0.752    |            |          |          |       |          | 3.27E-01 | 6.20E-02 | 8.19E-01 | 0.823 | 0.726    |

Mean mean posterior distribution; q0.25 quantile 2.5%; q9.75 quantile 97.5%

$N_e$ ,  $N_f$  effective population sizes;  $t_1$  start of PGM;  $t_0$  end of PGM.

Time priors and posterior probabilities are given in generations

## Piñeiro et al. Population fragmentation of two African trees during the Ice Ages

### *Greenwayodendron suaveolens*

|                          |                        | NORTH WEST |          |          |       |          | SOUTH WEST |          |          |       |          | NORTH EAST |          |          |       |          | SOUTH EAST |          |          |       |          |
|--------------------------|------------------------|------------|----------|----------|-------|----------|------------|----------|----------|-------|----------|------------|----------|----------|-------|----------|------------|----------|----------|-------|----------|
| PARAMETER                | PRIOR DISTRIBUTION     | mean       | q025     | q975     | Mean  | Factor 2 | mean       | q025     | q975     | Mean  | Factor 2 | mean       | q025     | q975     | Mean  | Factor 2 | mean       | q025     | q975     | Mean  | Factor 2 |
| $N_e$                    | Uniform (1,000-50,000) | 35800.00   | 1.32E+04 | 4.94E+04 | 0.951 | 0.72     | 3.23E+04   | 1.16E+04 | 4.92E+04 | 0.657 | 0.696    | 2.72E+04   | 9.10E+03 | 4.85E+04 | 0.602 | 0.726    | 3.04E+04   | 8.32E+03 | 4.91E+04 | 0.734 | 0.746    |
| $N_f$                    | Uniform (10-500)       | 2.50E+02   | 3.67E+01 | 4.85E+02 | 0.63  | 0.782    | 3.63E+02   | 7.60E+01 | 4.96E+02 | 0.896 | 0.756    | 3.64E+02   | 7.66E+01 | 4.96E+02 | 0.692 | 0.78     | 2.16E+02   | 2.74E+01 | 4.76E+02 | 0.546 | 0.786    |
| $t_1$                    | Uniform (0-1900)       | 1.58E+03   | 7.89E+02 | 1.89E+03 | 0.164 | 0.92     |            |          |          |       |          |            |          |          |       |          | 1.56E+03   | 7.82E+02 | 1.89E+03 | 0.185 | 0.928    |
| $t_0$                    | Uniform (0-1900)       | 1.00E+03   | 2.39E+02 | 1.71E+03 | 1.017 | 0.688    | 1.51E+03   | 7.45E+02 | 1.89E+03 | 1.709 | 0.726    | 1.54E+03   | 8.06E+02 | 1.89E+03 | 1.298 | 0.744    | 1.02E+03   | 2.83E+02 | 1.70E+03 | 1.792 | 0.656    |
| Mean $\mu$               | Logit (1E-05-1E-03)    | 7.79E-04   | 3.92E-04 | 9.93E-04 | 0.907 | 0.544    | 8.63E-04   | 6.13E-04 | 9.95E-04 | 0.583 | 0.686    | 8.61E-04   | 6.10E-04 | 9.95E-04 | 0.489 | 0.698    | 7.32E-04   | 2.99E-04 | 9.91E-04 | 0.788 | 0.588    |
| Mean $P$                 | Uniform (0.1-0.5)      | 4.94E-01   | 4.74E-01 | 5.00E-01 | 0.161 | 0.922    | 4.93E-01   | 4.67E-01 | 5.00E-01 | 0.09  | 0.962    | 4.72E-01   | 3.82E-01 | 5.00E-01 | 0.082 | 0.978    | 4.83E-01   | 4.17E-01 | 5.00E-01 | 0.141 | 0.932    |
| $N_e * \text{Mean } \mu$ |                        | 2.74E+01   | 1.08E+01 | 4.53E+01 | 1.764 | 0.476    | 2.78E+01   | 1.02E+01 | 4.60E+01 | 1.472 | 0.544    | 2.33E+01   | 7.97E+00 | 4.42E+01 | 1.126 | 0.532    | 2.15E+01   | 6.86E+00 | 4.31E+01 | 1.034 | 0.562    |
| $N_f * \text{Mean } \mu$ |                        | 1.94E-01   | 2.65E-02 | 4.26E-01 | 1.829 | 0.498    | 3.11E-01   | 6.72E-02 | 4.68E-01 | 1.354 | 0.614    | 3.12E-01   | 6.66E-02 | 4.68E-01 | 1.044 | 0.62     | 1.57E-01   | 1.81E-02 | 4.04E-01 | 1.389 | 0.52     |
| $t_1 * \text{Mean } \mu$ |                        | 1.23E+00   | 4.92E-01 | 1.79E+00 | 1.009 | 0.57     | 1.29E+00   | 6.69E-01 | 1.78E+00 | 0.934 | 0.776    | 1.32E+00   | 7.08E-01 | 1.78E+00 | 0.503 | 0.78     | 1.14E+00   | 3.90E-01 | 1.77E+00 | 0.92  | 0.566    |
| $t_0 * \text{Mean } \mu$ |                        | 7.66E-01   | 1.76E-01 | 1.40E+00 | 0.64  | 0.706    |            |          |          |       |          |            |          |          |       |          | 7.25E-01   | 1.84E-01 | 1.32E+00 | 0.958 | 0.676    |

mean mean posterior distribution; q0.25 quantile 2.5%; q9.75 quantile 97.5%

e,  $N_1$  effective population sizes;  $t_1$  start of PGM;  $t_0$  end of PGM.

time priors and posterior probabilities are given in generations

Piñeiro et al. Population fragmentation of two African trees during the Ice Ages

**Table S2C.**  
**NARROW TIME MODELS -**  
**Scorodophloeus zenkeri**

|                           |                        | NW       |          |          |       |          | WEST     |       |          |        |          | SOUTH WEST |          |          |       |          | EAST     |          |          |       |          |
|---------------------------|------------------------|----------|----------|----------|-------|----------|----------|-------|----------|--------|----------|------------|----------|----------|-------|----------|----------|----------|----------|-------|----------|
| PARAMETER                 | PRIOR DISTRIBUTION     | mean     | q025     | q975     | Mean  | Factor 2 | mean     | q025  | q975     | Mean   | Factor 2 | mean       | q025     | q975     | Mean  | Factor 2 | mean     | q025     | q975     | Mean  | Factor 2 |
| $N_e$                     | Uniform (1,000-50,000) | 2.59E+0  | 4.22E+03 | 4.86E+04 | 0.827 | 0.746    | 2.21E+04 | 3.11E | 4.78E+04 | 0.521  | 0.776    | 1.55E+04   | 3.32E+03 | 4.38E+04 | 0.355 | 0.82     | 1.72E+04 | 1.84E+03 | 4.60E+04 | 0.638 | 0.750    |
| $t_0'$                    | Uniform (1200-1300)    | 1.25E+0  | 1.20E+03 | 1.30E+03 | 0.001 | 1.000    | 1.25E+03 | 1.20E | 1.30E+03 | -0.002 | 1.000    | 1.25E+03   | 1.20E+03 | 1.30E+03 | 0.002 | 1.000    | 1.25E+03 | 1.20E+03 | 1.30E+03 | 0.001 | 1.000    |
| $N_1$                     | Uniform (10-500)       | 1.46E+0  | 2.44E+01 | 4.05E+02 | 0.244 | 0.86     | 2.79E+02 | 7.08E | 4.86E+02 | 0.343  | 0.828    | 3.05E+02   | 3.86E+01 | 4.93E+02 | 1.307 | 0.734    | 2.56E+02 | 5.61E+01 | 4.82E+02 | 0.333 | 0.822    |
| $t_1'$                    | Uniform (1400-1900)    | 1.69E+0  | 1.43E+03 | 1.89E+03 | 0.002 | 1.000    | 1.66E+03 | 1.42E | 1.89E+03 | 0.006  | 1.000    |            |          |          |       |          | 1.66E+03 | 1.42E+03 | 1.89E+03 | 0.003 | 1.000    |
| Mean $\mu$                | Logit (1E-05-1E-03)    | 3.12E-04 | 1.24E-04 | 6.52E-04 | 0.242 | 0.834    | 3.44E-04 | 1.20E | 7.91E-04 | 0.156  | 0.904    | 4.35E-04   | 2.08E-04 | 8.18E-04 | 0.225 | 0.912    | 3.48E-04 | 1.01E-04 | 8.07E-04 | 0.355 | 0.770    |
| Mean $P$                  | Uniform (0.1-0.5)      | 3.80E-01 | 1.84E-01 | 4.95E-01 | 0.151 | 0.944    | 3.17E-01 | 1.20E | 4.82E-01 | 0.107  | 0.948    | 4.47E-01   | 3.37E-01 | 5.00E-01 | 0.053 | 0.982    | 4.02E-01 | 1.58E-01 | 4.99E-01 | 0.103 | 0.958    |
| $N_e * \text{Mean } \mu$  |                        | 7.61E+0  | 1.60E+00 | 2.04E+01 | 0.485 | 0.698    | 6.94E+00 | 1.44E | 2.18E+01 | 0.453  | 0.684    | 6.34E+00   | 1.48E+00 | 1.89E+01 | 0.445 | 0.762    | 5.10E+00 | 1.04E+00 | 1.79E+01 | 0.394 | 0.772    |
| $t_0' * \text{Mean } \mu$ |                        | 3.90E-01 | 1.55E-01 | 8.07E-01 | 0.242 | 0.834    | 4.29E-01 | 1.50E | 9.88E-01 | 0.152  | 0.904    | 5.43E-01   | 2.59E-01 | 1.03E+00 | 0.227 | 0.91     | 4.35E-01 | 1.26E-01 | 1.01E+00 | 0.353 | 0.766    |
| $N_1 * \text{Mean } \mu$  |                        | 4.10E-02 | 8.00E-03 | 1.14E-01 | 0.341 | 0.76     | 8.74E-02 | 2.47E | 2.12E-01 | 0.318  | 0.802    | 1.24E-01   | 2.05E-02 | 2.65E-01 | 1.372 | 0.71     | 8.09E-02 | 1.88E-02 | 2.11E-01 | 0.487 | 0.710    |
| $t_1' * \text{Mean } \mu$ |                        | 5.29E-01 | 2.04E-01 | 1.11E+00 | 0.258 | 0.816    | 5.75E-01 | 1.87E | 1.36E+00 | 0.173  | 0.894    |            |          |          |       |          | 5.83E-01 | 1.56E-01 | 1.38E+00 | 0.375 | 0.746    |

Mean mean posterior distribution; q0.25 quantile 2.5%; q9.75 quantile 97.5%

$N_e$ ,  $N_1$  effective population sizes;  $t_1'$  start of PGM;  $t_0'$  end of PGM.

Time priors and posterior probabilities are given in generations

## Piñeiro et al. Population fragmentation of two African trees during the Ice Ages

### *Greenwayodendron suaveolens*

|                           |                        | NORTH WEST |          |          |        |          | SOUTH WEST |          |          |        |          | NORTH EAST |          |          |       |          | SOUTH EAST |          |          |        |          |
|---------------------------|------------------------|------------|----------|----------|--------|----------|------------|----------|----------|--------|----------|------------|----------|----------|-------|----------|------------|----------|----------|--------|----------|
| PARAMETER                 | PRIOR DISTRIBUTION     | mean       | q025     | q975     | Mean   | Factor 2 | mean       | q025     | q975     | Mean   | Factor 2 | mean       | q025     | q975     | Mean  | Factor 2 | mean       | q025     | q975     | Mean   | Factor 2 |
| $N_e$                     | Uniform (1,000-50,000) | 3.88E+04   | 1.81E+0  | 4.97E+0  | 0.761  | 0.734    | 3.28E+04   | 1.25E+04 | 4.93E+04 | 0.415  | 0.808    | 2.81E+04   | 9.92E+03 | 4.84E+04 | 0.289 | 0.84     | 3.19E+04   | 1.03E+04 | 4.93E+04 | 0.517  | 0.8      |
| $t_0'$                    | Uniform (1200-1300)    | 1.25E+03   | 1.20E+0  | 1.30E+0  | -0.001 | 1        | 1.25E+03   | 1.20E+03 | 1.30E+03 | -0.001 | 1        | 1.25E+03   | 1.20E+03 | 1.30E+03 | 0.001 | 1        | 1.25E+03   | 1.20E+03 | 1.30E+03 | -0.001 | 1        |
| $N_f$                     | Uniform (10-500)       | 2.25E+02   | 4.89E+0  | 4.75E+0  | 0.358  | 0.84     | 3.75E+02   | 1.04E+02 | 4.97E+02 | 0.948  | 0.736    | 3.82E+02   | 1.17E+02 | 4.97E+02 | 0.798 | 0.728    | 1.74E+02   | 3.02E+01 | 4.54E+02 | 0.297  | 0.852    |
| $t_1'$                    | Uniform (1400-1900)    | 1.71E+03   | 1.43E+0  | 1.89E+0  | 0.01   | 1        |            |          |          |        |          |            |          |          |       |          | 1.69E+03   | 1.42E+03 | 1.89E+03 | 0.007  | 1        |
| Mean $\mu$                | Logit (1E-05-1E-03)    | 6.14E-04   | 2.52E-04 | 9.69E-04 | 0.339  | 0.772    | 8.74E-04   | 6.42E-04 | 9.95E-04 | 0.119  | 0.928    | 8.73E-04   | 6.41E-04 | 9.95E-04 | 0.149 | 0.946    | 7.24E-04   | 3.61E-04 | 9.81E-04 | 0.552  | 0.688    |
| Mean $P$                  | Uniform (0.1-0.5)      | 4.95E-01   | 4.78E-01 | 5.00E-01 | 0.095  | 0.948    | 4.93E-01   | 4.68E-01 | 5.00E-01 | 0.084  | 0.982    | 4.74E-01   | 3.85E-01 | 5.00E-01 | 0.087 | 0.978    | 4.84E-01   | 4.25E-01 | 5.00E-01 | 0.082  | 0.974    |
| $N_e * \text{Mean } \mu$  |                        | 2.35E+01   | 9.18E+0  | 4.30E+0  | 0.431  | 0.758    | 2.85E+01   | 1.10E+01 | 4.58E+01 | 0.37   | 0.772    | 2.43E+01   | 8.73E+00 | 4.41E+01 | 0.297 | 0.822    | 2.27E+01   | 7.89E+00 | 4.27E+01 | 0.384  | 0.774    |
| $t_0' * \text{Mean } \mu$ |                        | 7.64E-01   | 3.14E-01 | 1.21E+0  | 0.338  | 0.772    | 1.09E+00   | 8.07E-01 | 1.27E+00 | 0.118  | 0.928    | 1.09E+00   | 7.97E-01 | 1.27E+00 | 0.149 | 0.95     | 9.04E-01   | 4.49E-01 | 1.23E+00 | 0.548  | 0.688    |
| $N_1 * \text{Mean } \mu$  |                        | 1.31E-01   | 3.04E-02 | 3.33E-01 | 0.537  | 0.688    | 3.26E-01   | 9.49E-02 | 4.69E-01 | 0.875  | 0.686    | 3.31E-01   | 1.05E-01 | 4.70E-01 | 0.746 | 0.7      | 1.19E-01   | 2.42E-02 | 3.21E-01 | 0.672  | 0.638    |
| $t_1' * \text{Mean } \mu$ |                        | 1.06E+00   | 4.00E-01 | 1.75E+0  | 0.371  | 0.762    |            |          |          |        |          |            |          |          |       |          | 1.23E+00   | 5.62E-01 | 1.77E+00 | 0.579  | 0.684    |

Mean mean posterior distribution; q0.25 quantile 2.5%; q9.75 quantile 97.5%

$N_e$ ,  $N_1$  effective population sizes;  $t_1'$  start of PGM;  $t_0'$  end of PGM.

Time priors and posterior probabilities are given in generations

**Piñeiro et al. Population fragmentation of two African trees during the Ice Ages**

Table S3. Pairwise genetic differentiation between intraspecific nSSR genetic clusters of *Scorodophloeus zenkeri* and *Greenwayodendron suaveolens*.

|                      |        |        |        |        |
|----------------------|--------|--------|--------|--------|
| <i>G. suaveolens</i> |        |        |        |        |
| NORTH EAST           |        |        |        |        |
| SOUTH EAST           | 0.0387 |        |        |        |
| NORTH WEST           | 0.1370 | 0.1504 |        |        |
| SOUTH WEST           | 0.0472 | 0.0879 | 0.1214 |        |
| <i>S. zenkeri</i>    |        |        |        |        |
| SOUTH WEST           |        |        |        |        |
| WEST                 | 0.0731 |        |        |        |
| CONGO                | 0.2268 | 0.2146 |        |        |
| EAST                 | 0.1272 | 0.0877 | 0.1865 |        |
| NORTH WEST           | 0.1588 | 0.1646 | 0.2264 | 0.1347 |

**Piñeiro et al. Population fragmentation of two African trees during the Ice Ages**

Table S4 Allelic patterns across individuals

| <b><i>Greenwayodendron<br/>suaveolens</i></b> | NORTH WEST | WEST | NORTH EAST | SOUTH EAST |
|-----------------------------------------------|------------|------|------------|------------|
| Na                                            | 16.4       | 17.1 | 18.6       | 17.4       |
| Na Freq. >= 5%                                | 3.9        | 6.1  | 5.6        | 5.4        |
| Ne                                            | 6.4        | 6.8  | 7.1        | 5.3        |
| I                                             | 1.9        | 2.1  | 2.3        | 1.9        |
| No. Private Alleles                           | 2.1        | 2.1  | 1.6        | 1.4        |
| No. LComm Alleles (<=25%)                     | 0.0        | 0.0  | 0.0        | 0.0        |
| No. LComm Alleles (<=50%)                     | 2.0        | 2.0  | 2.0        | 2.3        |
| He                                            | 0.7        | 0.8  | 0.8        | 0.8        |
| uHe                                           | 0.7        | 0.8  | 0.8        | 0.8        |
| % Private Alleles                             | 13.0       | 12.4 | 8.7        | 7.9        |

**Piñeiro et al. Population fragmentation of two African trees during the Ice Ages**

| <b><i>Scorodophloeus</i></b> |            |      |            |      |       |
|------------------------------|------------|------|------------|------|-------|
| <b><i>zenkeri</i></b>        | NORTH WEST | WEST | SOUTH WEST | EAST | CONGO |
| Na                           | 6.5        | 8.3  | 8.3        | 8.7  | 5.4   |
| Na Freq. >= 5%               | 3.5        | 3.8  | 3.7        | 4.3  | 3.6   |
| Ne                           | 2.7        | 3.3  | 2.9        | 3.8  | 2.7   |
| I                            | 1.1        | 1.4  | 1.3        | 1.4  | 1.1   |
| No. Private Alleles          | 0.5        | 0.5  | 1.0        | 1.1  | 0.5   |
| No. LComm Alleles (<=25%)    | 0.0        | 0.0  | 0.0        | 0.0  | 0.0   |
| No. LComm Alleles (<=50%)    | 1.0        | 0.9  | 0.9        | 0.9  | 0.7   |
| He                           | 0.5        | 0.6  | 0.6        | 0.6  | 0.5   |
| uHe                          | 0.5        | 0.6  | 0.6        | 0.6  | 0.5   |
| % Private Alleles            | 7.7        | 6.0  | 12.1       | 12.6 | 9.3   |

I = Shannon's Information Index =  $-1 * \sum (p_i * \ln (p_i))$ ; No. Private Alleles = No. of Alleles Unique to a Single Population;  
uHe = Unbiased Expected Heterozygosity =  $(2N / (2N-1)) * He$





**Piñeiro et al. Population fragmentation of two African trees during the Ice Ages**

Table S5. Posterior probability distributions of demographic parameters for the most likely scenario implemented with DIYABC. Time parameters are given in Kyr BP (1 generation= 100 years). (A) BROAD TIME MODELS: bottleneck and/or expansion from the beginning of the Penultimate Glacial Maxima (PGM, 190 Kyr-0 yr BP) to the present; (B) NARROW TIME MODELS: bottleneck and/or expansion during/after the PGM (190-120 Kyr BP).

|                                           | A. BROAD TIME MODELS |                |                 |                   | B. NARROW TIME MODELS |                |               |               |
|-------------------------------------------|----------------------|----------------|-----------------|-------------------|-----------------------|----------------|---------------|---------------|
|                                           | $N_e$                | $N_1$          | Bottleneck      | Expansion         | $N_e'$                | $N_1'$         | Bottleneck'   | Expansion'    |
| <b><i>Scorodophoeus zenkeri</i></b>       |                      |                |                 |                   |                       |                |               |               |
| NORTH WEST                                | 24500 [3360,48600]   | 186 [24,440]   | 146 [73,188]    | 65.4 [17.1,141]   | 25900 [4220,48600]    | 146 [24.4,405] | 169 [143,189] | 125 [120,130] |
| WEST                                      | 21700 [2810,47700]   | 294 [58.2,490] | 143 [62,189]    | 89.3 [20.4,164]   | 22100 [3110,47800]    | 279 [70.8,486] | 166 [142,189] | 125 [120,130] |
| SOUTH WEST                                | 18500 [3970,47000]   | 323 [44.5,494] |                 | 98.8 [17.9,185.0] | 15500 [3320,43800]    | 305 [38.6,493] |               | 125 [120,130] |
| EAST                                      | 18300 [1940,47000]   | 279 [47.4,488] | 145 [65,188]    | 86.6 [15.7,165.0] | 17200 [1840,46000]    | 256 [56.1,482] | 166 [142,189] | 125 [120,130] |
| <b><i>Greenwayodendron suaveolens</i></b> |                      |                |                 |                   |                       |                |               |               |
| NORTH WEST                                | 35800 [13200,49400]  | 250 [3.67,485] | 158 [78.9,189]  | 100 [23.9, 171]   | 38800 [18100, 49700]  | 225 [48.9,475] | 171 [143,189] | 125 [120,130] |
| SOUTH WEST                                | 32300 [11600, 49200] | 363 [7.60,496] |                 | 151 [74.5,189]    | 32800 [12500,49300]   | 375 [104,497]  |               | 125 [120,130] |
| NORTH EAST                                | 27200 [9100, 48500]  | 364 [7.66,496] |                 | 154 [80.6,189]    | 28100 [9900,248400]   | 382 [11.7,497] |               | 125 [120,130] |
| SOUTH EAST                                | 30400 [8320, 49100]  | 216 [2.74,476] | 156 [78.2, 189] | 102 [28.3,170]    | 31900 [10300,49300]   | 174 [30.2,454] | 169 [142,189] | 125 [120,130] |

Posterior distribution: Mean (Quantile 2.5%-Quantile 97.5%)

$N_e$   $N_1$ -effective population sizes; Bottleneck-start time of bottleneck in Kyr BP; Expansion-start time of expansion event in Kyr BP

Prior distributions for Broad Time Models:  $N_e$  Uniform (1,000-50,000);  $N_1$  Uniform (10-500);  $t_1=t_0$  uniform (0-1900) ,  $t_0$  (0-1900),  $t_0<t_1$ , from the start of the PGM to the present.

Prior distributions for Narrow Time Models:  $N_e$  Uniform (1,000-50,000);  $N_1$  Uniform (10-500);  $t_1'$  (1400-1900);  $t_0'$  (1200-1300), time priors given in generations,  $t_1'$  corresponds to the start of PGM;  $t_0'$  corresponds to the end of PGM

Time priors are given in generations; time posterior probabilities are given in Kyr BP (generation= 100 years)
