# Supplementary material
Source: PubMed Central journal article supplement (PMC5698650)

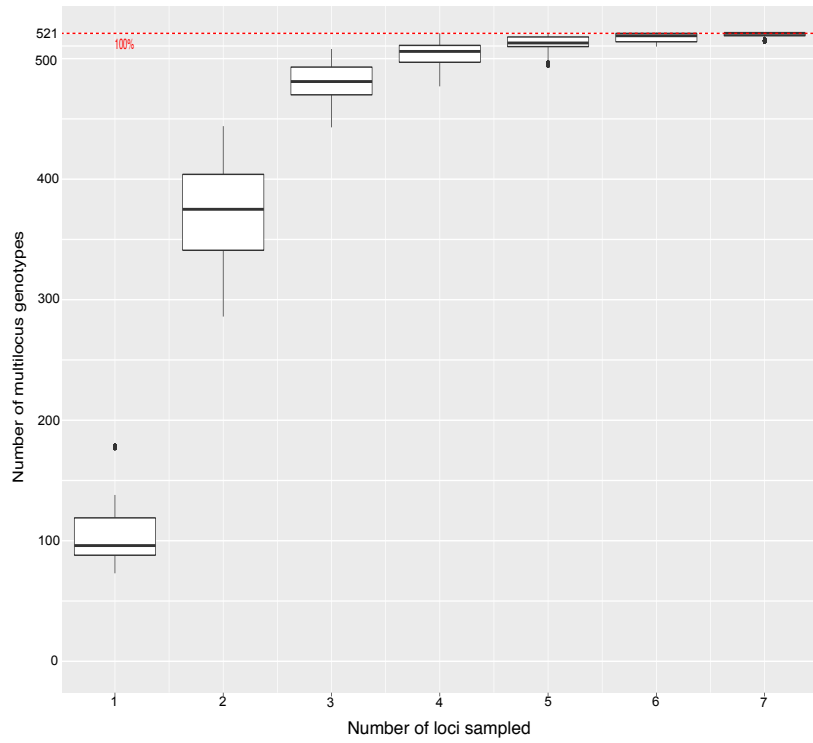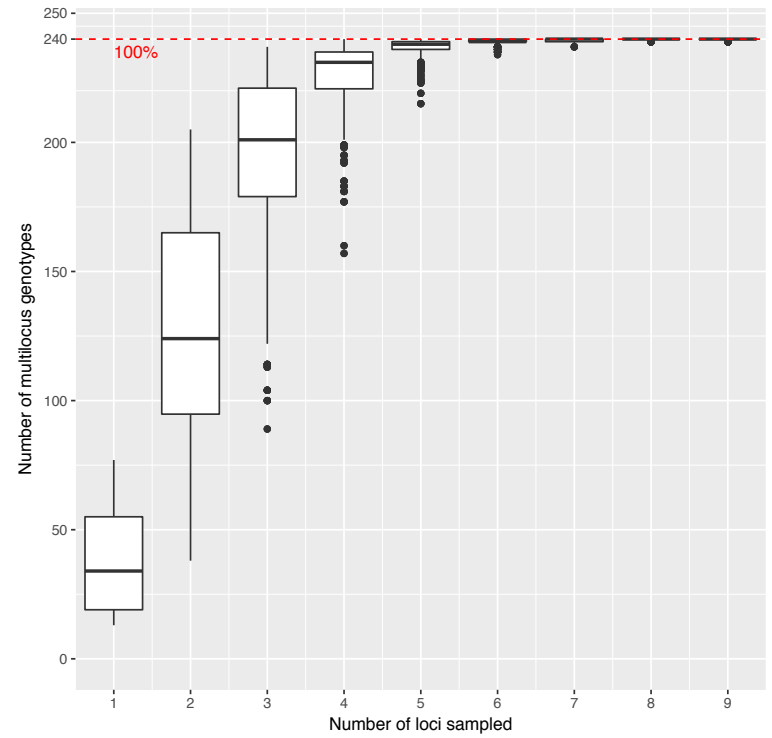

Supplement: rspb20171800supp1.pdf [file rspb20171800supp1.pdf]

**A**

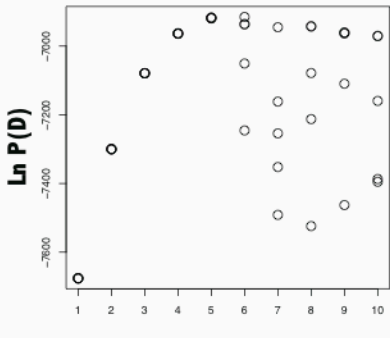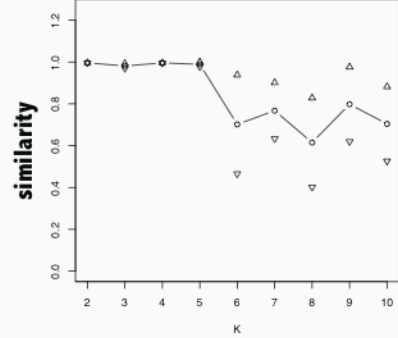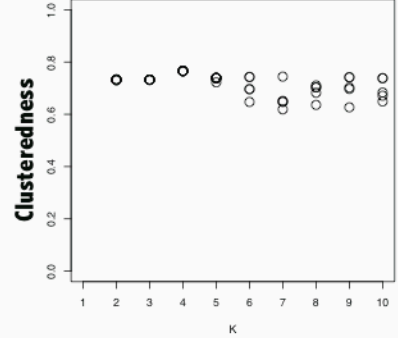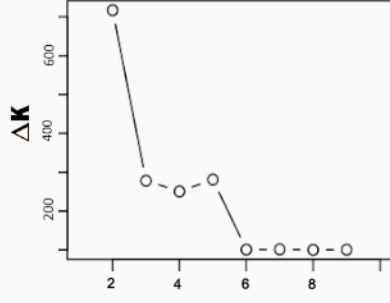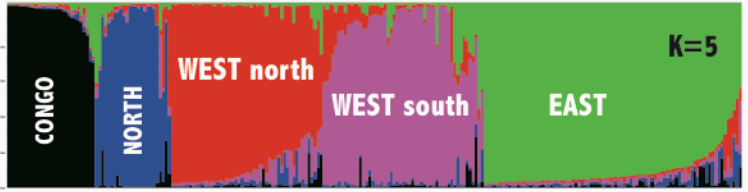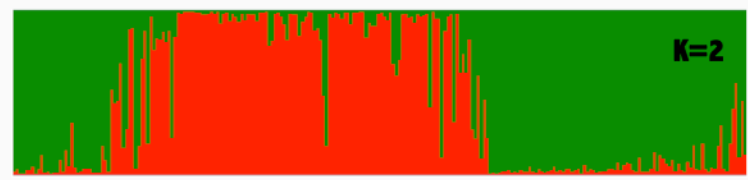

**B**

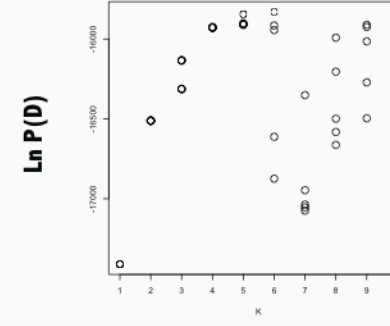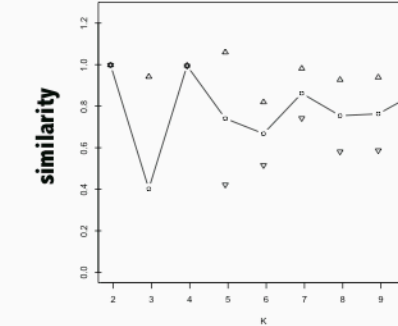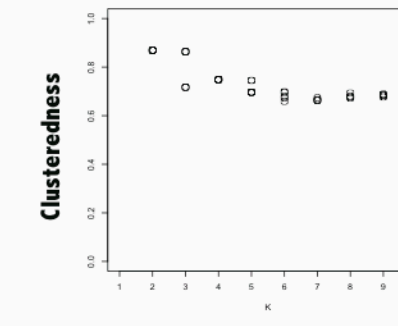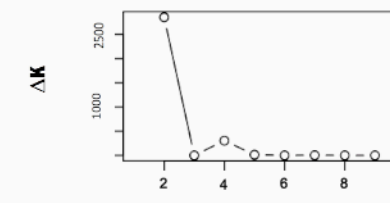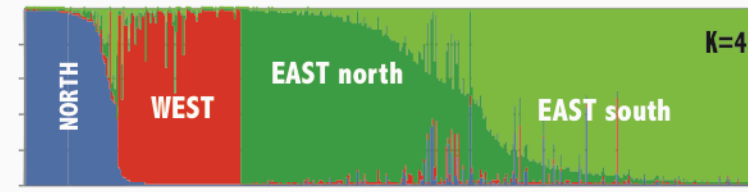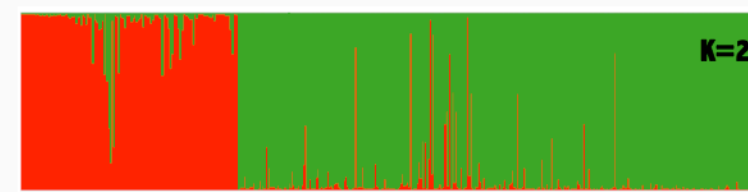

Supplement: rspb20171800supp2.pdf [file rspb20171800supp2.pdf]

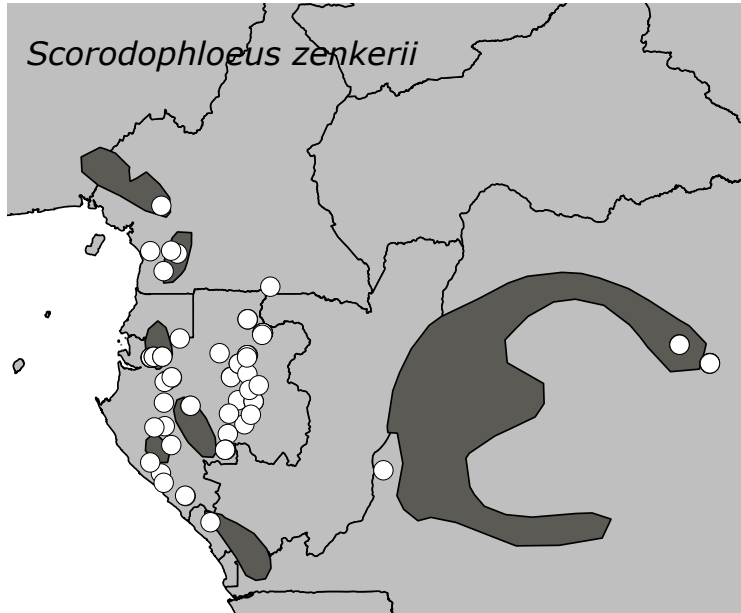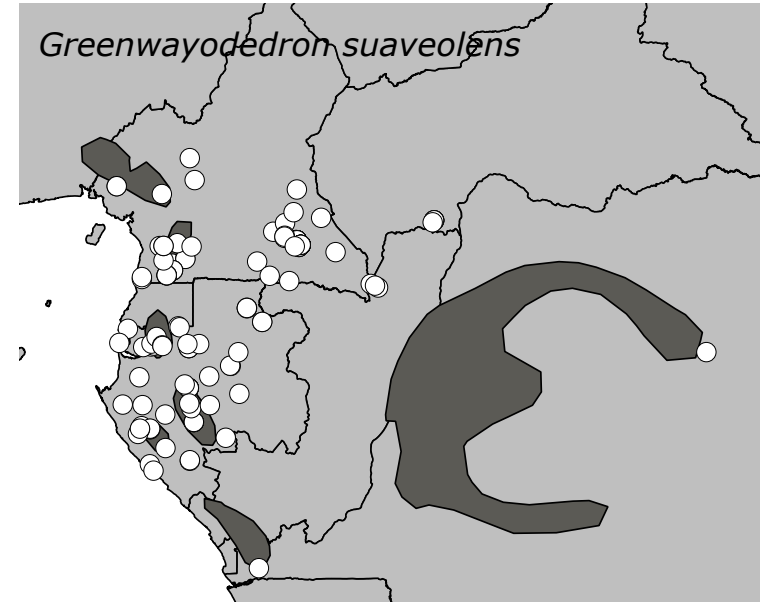

Supplement: rspb20171800supp3.pdf [file rspb20171800supp3.pdf]
